## Title

PGRMC1 phosphorylation status and cell plasticity 1: glucose metabolism, mitochondria, and mouse xenograft tumorigenesis

## Authors

Bashar M. Thejer,<sup>1,2,3</sup> Partho P. Adhikary,<sup>1,2,4</sup> Amandeep Kaur,<sup>5,6</sup> Sarah L. Teakel,<sup>1</sup> Ashleigh Van Oosterum,<sup>7</sup> Ishith Seth,<sup>1</sup> Marina Pajic,<sup>8,9</sup> Kate M. Hannan,<sup>10,11</sup> Megan Pavy,<sup>11</sup> Perlita Poh,<sup>11</sup> Jalal A. Jazayeri,<sup>1</sup> Thiri Zaw,<sup>12</sup> Dana Pascovici,<sup>12</sup> Marina Ludescher,<sup>13</sup> Michael Pawlak,<sup>14</sup> Juan C. Cassano,<sup>15</sup> Lynne Turnbull,<sup>16</sup> Mitra Jazayeri,<sup>17</sup> Alexander C. James,<sup>18,19,20</sup> Craig P. Coorey,<sup>18,21</sup> Tara L. Roberts,<sup>18,19,20,21</sup> Simon J. Kinder,<sup>22</sup> Ross D. Hannan,<sup>9,10,23,24,25</sup> Ellis Patrick,<sup>26</sup> Mark P. Molloy,<sup>12,27</sup> Elizabeth J. New,<sup>5</sup> Tanja N. Fehm,<sup>13</sup> Hans Neubauer,<sup>13</sup> Ewa M. Goldys,<sup>28,29</sup> Leslie A. Weston,<sup>30,31</sup> and Michael A. Cahill.<sup>1,10,\*</sup>

## Affiliations

1. School of Biomedical Sciences, Charles Sturt University, Wagga Wagga, NSW, 2650, Australia.
2. Co-first author.
3. Department of Biology, College of Science, University of Wasit, Wasit, Iraq.
4. Current address: Faculty of Pharmaceutical Sciences, The University of British Columbia, Vancouver, Canada.
5. University of Sydney, School of Chemistry, Sydney, NSW, 2006 Australia.
6. Current address: University of Sydney, School of Medical Sciences, Sydney, NSW, 2006 Australia.

7. Life Sciences and Health, Faculty of Science, Charles Sturt University, Wagga Wagga, NSW, 2650, Australia.
8. The Kinghorn Cancer Centre, Cancer Division, Garvan Institute of Medical Research, 384 Victoria St, Darlinghurst, Sydney, NSW, 2010, Australia
9. St Vincent's Clinical School, Faculty of Medicine, University of NSW, Australia
10. Department of Biochemistry and Molecular Biology, University of Melbourne, Parkville, Victoria 3010, Australia.
11. ACRF Department of Cancer Biology and Therapeutics, The John Curtin School of Medical Research, ACT 2601, Australia.
12. Australian Proteome Analysis Facility, Macquarie University, Sydney, NSW, 2109, Australia.
13. Department of Gynecology and Obstetrics, University Women's Hospital of Dusseldorf, Dusseldorf, Germany.
14. NMI Natural and Medical Sciences Institute at the University of Tubingen, Reutlingen, Germany.
15. Particles-Biology Interactions Laboratory, Department of Materials Meet Life, Swiss Federal Laboratories for Materials Science & Technology (Empa), Lerchenfeldstrasse 5, CH-9014, St Gallen, Switzerland.
16. The itthree institute, University of Technology Sydney, Ultimo, NSW, 2007, Australia. Present address: GE Healthcare Life Sciences, Issaquah, WA, USA.
17. Department of Mathematics and Statistics, La Trobe University, Melbourne, VIC, 3086, Australia.
18. Ingham Institute for Applied Medical Research, Liverpool, NSW, 2170, Australia.
19. School of Medicine, Western Sydney University, Locked Bag 1797, Penrith, NSW, 2751, Australia.
20. School of Medicine UNSW Australia, Kensington, NSW, 2033, Australia.

21. School of Medicine and University of Queensland Centre for Clinical Research, Herston, QLD, 4006, Australia.
22. AXT Pty Ltd, Warriewood (Sydney), NSW, 2102, Australia.
23. Division of Research, Peter MacCallum Cancer Centre, Melbourne, Victoria, 3000, Australia.
24. Sir Peter MacCallum Department of Oncology, University of Melbourne, Parkville, Victoria 3010, Australia.
25. Department of Biochemistry and Molecular Biology, Monash University, Clayton, Victoria 3168, Australia.
26. School of Mathematics and Statistics, University of Sydney, Sydney, NSW 2006, Australia.
27. Present address: The Kolling Institute, The University of Sydney, Sydney, NSW, Australia.
28. ARC Centre of Excellence for Nanoscale BioPhotonics, Macquarie University, Sydney, NSW 2109, Australia.
29. Present address: The Graduate School of Biomedical Engineering, University of New South Wales, Sydney, Kensington, 2052, NSW, Australia.
30. Graham Centre for Agricultural Innovation, Charles Sturt University, Boorooma Street, Wagga Wagga, NSW 2678, Australia.
31. School of Agricultural and Wine Sciences, Charles Sturt University, Boorooma Street, Wagga Wagga, NSW 2678, Australia.

\*Correspondence: [mcahill@csu.edu.au](mailto:mcahill@csu.edu.au)

## ABSTRACT

Background: Progesterone Receptor Membrane Component 1 (PGRMC1) is expressed in many cancer cells, where it is associated with detrimental patient outcomes. Multiple different functions and cellular locations have been attributed to PGRMC1 in a variety of contexts, however the mechanisms underlying PGRMC1 biology remain obscure. The protein contains several phosphorylated residues including tyrosines which were acquired in animal evolution prior to bilateral symmetry, and could be involved with animal cell differentiation mechanisms.

Results: Here we demonstrate that mutagenic manipulation of PGRMC1 phosphorylation status in MIA PaCa-2 pancreatic cells exerts broad pleiotropic effects, influencing cell plasticity and tumorigenicity, as assayed by cell biological and proteomics measurements. Relative to parental cells over-expressing hemagglutinin-tagged wild-type PGRMC1-HA, cells expressing a PGRMC1-HA-S57A/S181A double mutant exhibited reduced levels of proteins involved in energy metabolism and mitochondrial function, and altered glucose metabolism suggesting modulation of the Warburg effect. This was associated with Rho-kinase inhibitor-sensitive changes including altered cell shape, motility, increased PI3K/Akt activity, and fragmented mitochondrial morphology. An S57A/Y180F/S181A triple mutant reduced PI3K/Akt activity, indicating involvement of Y180 in PI3K/Akt induction. Both triple mutant and Y180F single mutant cells exhibited attenuated mouse xenograft tumor growth.

Conclusions: Phosphorylation status of the PGRMC1 tyrosine 180 regulatory motif exerts dramatic influence over cancer cell biology, including Warburg effect-like glucose metabolism. In accompanying papers we show that: 1) the cells examined here exhibit dramatically altered metabolism and epigenetic status, with the triple mutant inducing hypermethylation similar to that of embryonic stem cells, and that 2) Y180 was acquired in evolution concurrently with appearance of the organizer that induces animal

gastrulation. Taken together, these results indicate that the undescribed mechanisms regulating PGRMC1 phosphorylation may be of great disease relevance and merit urgent investigation.

### **KEY WORDS**

mitochondria, migration, invasion, organizer, embryology, metabolism, cytochrome P450, mesenchymal amoeboid transition, proteomics

## BACKGROUND

Progesterone (P4) Receptor Membrane Component 1 (PGRMC1) is a cytochrome b<sub>5</sub>-related heme-binding protein with predicted binding site motifs for Src homology 2 (SH2) and Src homology 3 (SH3) proteins, and some of these motifs can potentially be negatively regulated by phosphorylation at adjacent sites with consensus to casein kinase 2 (CK2) [1-3]. Casein kinase 2 (CK2) knockdown leads to reduced phosphorylation of the corresponding C-terminal CK2 site of PGRMC2, however, PGRMC1 phosphorylation at S181 was unaffected by CK2 knockout in C2C12 mouse myoblast cells [4]. These and other sites can all be phosphorylated *in vivo* [5]. The highly conserved motif at Y180/S181 arose early in animal evolution [6, 7], suggesting the possible ability to regulate events of foundational importance in animal cell differentiation.

PGRMC1 is a multi-functional protein with attested roles including cytochrome P450 interactions, membrane trafficking, G1 checkpoint control, conferral of P4-dependent resistance to cell death, and spindle stability in mitosis and meiosis. PGRMC1 is unrelated to the classical nuclear progesterone receptor, which evolved much later than PGRMC1 [6]. In concert with PGRMC2 and progestin and adipoQ receptor 7 (PAQR7), PGRMC1 suppresses passage through the G1 cell cycle check point in granulosa/luteal cells [8, 9], while PAQR7 and PGRMC1 form a complex that binds P4 [10].

Subcellular localization of PGRMC1 is variously nuclear, endoplasmic reticulum, cytoplasmic, plasma membrane, or exosome/extracellular (reviewed by [1, 3]). PGRMC1 association with membrane P4 receptors mPR $\alpha$  or PAQR7 [9, 10], epidermal growth factor receptor [11], glucagon-like peptide-1 receptor [12], insulin receptor, or glucose channels [13] is involved in their plasma membrane localization. The protein is involved in several steps of steroid biology, including regulation of the mevalonate pathway by

Insig/SCAP/SREBP, modification of the first sterol lanosterol from yeast to mammals, and in its conferral of steroid responsiveness (reviewed by [14]). Association of PGRMC1 with low density lipoprotein receptor (LDLR) and Sigma-2 receptor (S2R) TMEM97 mediates an accelerated route for LDLR endocytosis [15], and in an S2R-ligand sensitive complex with Sigma-1 receptor it associates with Dopamine D1 receptor [16] (PGRMC1 is erroneously referred to as S2R in this paper [15, 17, 18]). PGRMC1 also associates with and modulates mitochondrial ferrochelatase, the final enzyme in the heme synthetic pathway [19], as well as interacting with the kinetochore microtubules of both meiotic and mitotic spindles and active aurora kinase at metaphase centromeres [20-23]. PGRMC1 and PGRMC2 functionally interact, and PGRMC2 overexpression reduces cell migration but not the viability of SKOV-3 cells [24], whereas PGRMC2 attenuation reduced cell migration in MDA-MB-231 breast cancer cells [25].

PGRMC1 is up-regulated in some cancer types, where its levels correlate with poor patient outcomes [26-31]. A series of studies has implicated PGRMC1 with increased breast cancer risk in progestogen therapy regimes [32-36], as well as response to estrogen-related steroids [37]. PGRMC1 potentiates mouse xenograft tumor growth in multiple cell systems [32, 34, 38-40]. PGRMC1 protects cells from damage and promotes survival in a P4-dependent manner [39-43], and PGRMC1-dependent Akt signaling correlates with cell survival [41] or mortality [44, 45] in different systems. PGRMC1 is known to initiate or modulate the activity of cytoplasmic signaling in various other systems [11, 44-48], and its over-expression induces epithelial-mesenchymal transition (EMT) in MES-SA uterine sarcoma cells, which is associated with altered migratory and invasive properties [42]. PGRMC1 and its homolog PGRMC2 have been implicated in migration and invasive tumor biology, however effects vary between cell systems [24, 25, 27, 42, 49, 50]. Migration of cervical cancer cell lines and their invasiveness in transwell invasion

assays correlated with PGRMC1 expression and markers for EMT [31]. In human pluripotent stem cells (hPSCs) PGRMC1 suppresses cyclin D1 and the p53 and Wnt/ $\beta$ -catenin pathways to maintain pluripotency [51], and PGRMC1 modulates transcription of mitosis-promoting Wnt targeted genes with TCF/LEF transcription factor sites [52-55]. In summary, the suite of PGRMC1 functions indicates potentially important roles for tumor cell biology [3].

This present study was prompted by our previous discovery that PGRMC1 exhibited differential phosphorylation status between estrogen receptor positive and negative breast cancers. PGRMC1 was induced in the hypoxic zone of ductal carcinoma *in situ* breast lesions [44] at precisely the time and place that cells require a switch to glycolytic metabolism known as the Warburg effect, which resembles a reversion to stem-cell-like metabolism [56]. PGRMC1 was implicated in mediating the placental P4-dependent shift from aerobic towards anaerobic glucose metabolism in gestational diabetes [57]. We predicted the involvement of PGRMC1 with the onset of Warburg metabolism [44]. Furthermore, a PGRMC1 S57A/S181A double mutant (DM, Figure 1A) enabled the survival of otherwise lethal hydrogen peroxide treatment [44]. In the interim, we have proposed that PGRMC1 phosphorylation and other post-translational modifications regulate multiple alternative PGRMC1-dependent functions. We hypothesized that PGRMC1 is a signal hub protein with wide ranging effects on cancer and general cell biology [3, 5, 6, 14]. Consistent with our overarching hypothesis, Sabbir [55] recently reported that PGRMC1 induced a P4-dependent metabolic change resembling the Warburg effect in HEK293 cells, which was associated with changes in PGRMC1 stability, post-translational modifications, and subcellular locations. Hampton et al. also demonstrated association of PGRMC1 with the insulin receptor in A549 cells, where PGRMC1 attenuation lowered glucose uptake [13].



We previously observed that MIA PaCa-2 pancreatic cancer (MP) cells exhibited marked morphological and metabolic changes when a S57A/S181A double mutant (DM) protein was expressed [58]. MP cells are widely used to study pancreatic cancer cell biology [59-62]. They exist in culture as a mixed adherent population of elongated “fibroblast-shaped” morphology, a minority population of rounded morphology with bleb-like protrusions, and some multicellular clumps, as well as some rounded suspension cells. MP cells have undergone epithelial-mesenchymal transition [63], and can further undergo mesenchymal-amoeboid transition (MAT), which is dependent upon the activity of Rho Kinase (ROCK) and causes a morphological change from “elongated” mesenchymal cells to rounded amoeboid cells [64]. Here, we examined the effects of altered PGRMC1 phosphorylation status on MP cells to gain insights into PGRMC1-dependent signaling, and its role in subcutaneous mouse xenograft tumorigenesis which requires Y180.

This work is accompanied by two companion papers. In the first [65] we describe differences in metabolism associated with epigenetic genomic CpG methylation levels associated with PGRMC1 phosphorylation status. We also show that inability to phosphorylate the Y180 motif reduces the fidelity of genomic replication. In a second companion paper [7] we show that the combination of Y180 and Y139, which are both tyrosine phosphorylated [5], appeared in animal evolution at common ancestor of Cnidaria and Bilateria, preceding the evolution of bilateral body symmetry and mechanisms associated with embryological animal tissue differentiation. In combination, all three papers argue that the acquisition of PGRMC1 Y180 phosphorylation played a foundational role in animal evolution that explains why PGRMC1 can affect cell differentiation and plasticity in human disease.

## RESULTS

### Establishment of cell lines

To investigate the role of PGRMC1 phosphorylation in MP cells, we stably transfected MP cells with the hemagglutinin (HA) epitope-tagged PGRMC1-HA plasmids including the wild-type (WT) sequence [66], the previously published S57A/S181A DM [44], and a novel S57A/Y180F/S181A triple mutant (TM), which also mutated the tyrosine phosphate acceptor of the SH2 target motif centered on Y180 [1, 5, 6] (Figure 1A). Three independent stable cell lines were selected from each group (Figure 1B-E). In stably transfected cells both 32 kDa 3xHA-tagged exogenous and a 24 kDa endogenous species were detected by an anti-PGRMC1 antibody, whereas only the 24 kDa species was present in MP cells (Figure 1B). Both species were present at approximately equimolar ratios (Figure 1C), and an anti-HA antibody detected only the 32 kDa species (Figure 1D). We reasoned that any differences consistently observed between these biological triplicates should be due to the PGRMC1-HA mutations, rather than to undefined clonal artifacts. Subsequent experiments were performed using respective cell line triplicates 1-3 per PGRMC1-HA plasmid. Because of the dramatic effects observed, MP cells are included in our experiments as a literature reference point. MP differ from WT cells by not having undergone hygromycin selection, and by lack of overexpression of PGRMC1-HA. Therefore we cannot ascribe differences between MP and WT cells to PGRMC1-HA expression. The effects of the DM and TM PGRMC1 mutations are assessed relative to WT control levels.

### PGRMC1 phosphorylation status alters MIA PaCa-2 cellular morphology

Like MP cells, freshly seeded WT cells exhibited predominantly elongated cell morphology with some rounded cells. DM and TM cells exhibited primarily rounded morphology (Figure 1E), which was reminiscent of the reported mesenchymal-amoeboid

transition (MAT) of MIA PacCa-2 cells [64]. After 72 hours of culture the proportion of round cells in DM and TM cultures was reduced, but still elevated relative to WT or MP (not shown). Transient transfections with the DM and TM plasmids (but not WT) led to similar increased levels cell rounding across the entire populations of cells by 24 hours after transfection (data not shown), indicating that the phosphorylation status of exogenous PGRMC1-HA affects cell morphology.

### **PGRMC1-dependent altered morphology requires Rho Kinase**

The ROCK pathway is required for amoeboid phenotype and migration and its inhibition reverses MAT in MP cells [64, 67]. ROCK inhibitor (ROCKI) reversed the rounded phenotype to elongated for DM and TM (Figure 1F), supporting the hypothesis that morphological transition involves altered actin organization. It remains unclear from this result whether this process is related to true MAT.

### **PGRMC1 phosphorylation affects cell motility and invasion**

To further investigate cell plasticity imposed by PGRMC1-HA phosphorylation mutants, we examined cellular motility via a scratch assay [68]. MP cells exhibited the lowest migration into the void of scratched areas, while TM and WT cells exhibited relatively elevated rates and modes of migration. DM cell migration was substantially greater than other cell lines (Figure 2A-B, Supplemental Information File 1). DM cells migrated predominantly as rounded cells, using extended filopodia and small pseudopodia, however, a minority of flattened cells exhibited more pronounced pseudopodia. Video imaging demonstrated that these cell shapes could rapidly interconvert (Supplemental Information File 1C). Conversely, DM cells exhibited the lowest ability to invade through a Geltrex pseudo-basal membrane (Figure 2C-D).

## **PGRMC1 phosphorylation status affects proteins involved in many biological functions**

To gain further insight into these effects, we performed a global proteomics analysis with the Sequential Window Acquisition of all Theoretical Mass Spectrometry (SWATH-MS) platform [69]. A total of 1330 proteins were reliably identified across the data set in at least one sample by tandem mass spectrometry (MS/MS) of at least 2 peptides using a combination of information dependent acquisition (IDA) and data independent SWATH-MS acquisition, using the Swissprot 2014\_04 data base. Results are provided as Supplemental Information File 2. Approximately 50% of variation was explained by two principal components (PCs) in PC analysis, which corresponded approximately to “ribosomes and translation” (PC1, separated MP and DM from WT and TM) and “mRNA splicing and processing” (PC2, separated MP and WT from DM and TM) (Figure S1, Supplemental Information File 3). Of the identified proteins, 243 differed by 1.5 fold or more between any one or more comparisons with  $p < 0.05$  (t-test), and 235 of these withstood principal components analysis multiple sample correction. The Euclidian heat map clustering of those 243 proteins is provided in Figure 3, and in more detail as Supplemental Information File 6, revealing a suite of proteins which provided strong discrimination between the different PGRMC1-HA-induced cell conditions. Independent biological replicates of each of the cell types clustered tightly in clades that contain other replicates of the same cell type, with large distances between clades. We conclude that these differences consist primarily of specific PGRMC1-HA mutant-dependent effects.

Results from those six comparisons of protein abundance between the four sample types [1) MP v. WT, 2) MP v. DM, 3) MP v. TM, 4) WT v. DM, 5) WT v. TM, and 6) DM v. TM] provide lists of significantly differentially abundant proteins in each pair-wise comparison (Supplemental Information File 2). WebGestalt [70] enrichment analyses

(GO, KEGG Pathways, Wikipathways, Pathway Commons (PC), Transcription Factors) were performed to identify pathways or features either significantly more or less abundant (respectively the “red” and “blue” lists of proteins for each comparison from columns B of Supplemental Information File 4) between each of the respective six comparisons at  $\text{adj}P < 0.001$  level ( $\text{adj}P$  is a  $p$ -value adjusted by WebGestalt for Benjamini–Hochberg multiple sample correction) in at least one pairwise comparison. WebGestalt feature mapping is presented in Supplemental Information File 5. Those are plotted against the 243 protein proteomics heat map in Supplemental Information File 6, with primary WebGestalt data provided in Supplemental Information Files 5 and 6. The results are schematically mapped against the 243 protein heat map as Figure 3B, using all pathways that were detected by WebGestalt in any of the inter-sample comparisons at the  $\text{adj}P < 0.001$  level, and including all proteins detected in any of those pathways across all 12 comparisons from Supplemental Information File 8 at the  $\text{adj}P < 0.1$  level for respective red and blue protein lists from Supplemental Information File 4.

WT PGRMC1-HA protein induced the elevated abundance of many proteins involved in energy metabolism, including proteasomal components involved in protein degradation, and pathways for amino acid, carbohydrate, and fatty acid catabolism (Figure 3). These proteins were annotated as both cytoplasmic and mitochondrial. Peroxisomal and lysosomal proteins were also upregulated in WT cells. A suite of proteins putatively involved in the recognition of mRNA by ribosomes, tRNA aminoacylation, the translation of proteins by ribosomes, and chaperone-mediated protein folding was generally less abundant in WT and TM than MP and DM cells (Figure 3, Supplemental Information File 6). Many of the changes in fatty acid and glucose metabolism enzymes resemble the effects of the insulin/glucagon system of metabolic regulation. Loss of PGRMC1 affects the SREBP-1/fatty acid homeostasis system [71], and PGRMC1

influences cell surface localization of insulin receptor and glucose transporters [13]. Chemical proteomics showed that PGRMC2 but not PGRMC1 promotes adipogenesis in 3T3-L1 preadipocytes following a gain of function interaction with a novel small molecule which displaced heme [72]. It will be interesting to examine whether that treatment mimics the effects of phosphorylation. (PGRMC2 possesses cognates to PGRMC1 Y180 and S181, as well as heme-chelating Y113 [6].)

Many of the above proteins were inversely regulated in the comparison of WT and DM cells (Figure 3). The energy metabolizing suite of proteins and some proteins associated with translation were less abundant in DM, whereas the T-complex chaperone complex as well as some nuclear exportins and importins were elevated in DM cells (Figure S2C-D). Some differentially enriched pathways were specific for the WT vs. DM comparison. Different enzymes associated with heme metabolism were both up- and down-regulated while enzymes associated with glycosaminoglycan metabolism were up-regulated in WT relative to DM (Figure 3, Supplemental Information File 6).

Mitochondrial proteins accounted for a large percentage of the proteins which were more abundant in WT than DM cells, and intriguingly many cytoplasmic proteins were more abundant proportionally to total protein in WT cells than DM (Figure 3, Supplemental Information File 6). We also noted higher abundance components of ATP synthase in WT and TM cells (Figure S2B), changes of proteins involved in chaperonin and microtubule function (Figure S2C), and a group of proteins involved in major histocompatibility complex antigen processing and presentation, and proteolysis (Figure S2E). The latter are reduced in DM cells and may be associated with their reduced invasiveness (Figure 2C-D), which requires future confirmation.

Consideration of the extreme (highest and lowest abundance) differential proteins for each cell type offers useful insight into the biology at play (Figure S3). WT and TM cells exhibited overlap in the subset of most abundant proteins, which included PSIP1 transcriptional coactivator, TOM40 mitochondrial import channel, as well as CDIPT which catalyzes the biosynthesis of phosphatidylinositol (circles in Figure S3). One of the WT abundant proteins was K6PF phosphofructokinase (UniProt P08237), which catalyzes the rate limiting reaction and first committed step of glycolysis. The most abundant DM proteins included keratin 19, ubiquitin-associated protein 2-like, which is involved in stem cell maintenance [73], and methyl-CpG-binding protein 2, which was still more abundant in WT and TM cells, suggesting PGRMC1-mediated changes in genomic methylation (see accompanying paper [65]). The least abundant proteins shared a surprising mixed overlap between cell types (triangles in Figure S3). TM and WT cells shared low levels of Ephrin type-A receptor 2, a tyrosine kinase receptor, which was higher in DM (and MP) cells without being a top abundant protein in those cells. WT exhibited low levels of signal recognition particle 54 kDa protein, suggesting altered translation of endoplasmic reticulum proteins, and AL1A1 retinal dehydrogenase. This was notable because both DM and TM exhibited low levels of AL1A3 NAD-dependent aldehyde dehydrogenase involved in the formation of retinoic acid, suggesting alterations in retinoic acid metabolism by mutating S57/S181. DM and TM also shared low levels of ApoC3 and ApoA1 (Figure S3), probably reflecting common lower lipoprotein synthesis by those cells. The striking feature of these overlapping results is that proteins in Figure S3 represent only the half dozen absolutely lowest or highest abundance differential proteins expressed by each cell line. Taken together, our proteomics analysis revealed significant differences in the abundance of enzymes involved in a wide diversity of cell processes, many of which are directly implicated in cancer biology. The resemblance of WT and TM differential proteomics profiles suggests that the DM mutation activates

signaling processes that are largely dependent upon Y180. (The sole difference between DM and TM proteins is the phosphate acceptor oxygen of Y180). Overall, this study indicated that PGRMC1 phosphorylation status exerts higher order effects in MIA PaCa-2 cells.

### **ERR1-regulated genes contribute to the PGRMC1-WT phenotype, but ERR1 activity is not affected by PGRMC1**

Some mitochondrial proteins associated with energy metabolism were predicted by pathways enrichment analysis to be regulated by estrogen receptor related 1 (ERR1) transcription factor (Figure S4A) in the comparisons of DM cells with both WT (adjP=0.004) and TM (adjP=0.04) (Supplemental Information File 4). Since ERR1 is a steroid receptor, we investigated the potential for a link between the biology of PGRMC1 and ERR1 by attenuating ERR1 levels in WT cells using shRNA. This changed cell morphology from predominantly elongated to rounded cells (Figure S4B-D). SWATH-MS proteomics revealed that ERR1 indeed regulated genes differentially abundant between WT and DM cells observed in Figure S4A and Figure 3. However, PGRMC1 phosphorylation status affected the abundance of only a subset of ERR1-driven proteins.

### **PGRMC1 phosphorylation affects PI3K/Akt signaling**

Strikingly, proteins associated with PI3K/Akt activity from Figure 3 and Supplemental Information File 6 were revealed by Supplemental Information File 5 to exhibit lower activity in TM cells (Figure S2A) relative to MP (adjP=0.0063), WT (adjP=0.0001) and DM (adjP=0.0002) cells. We assayed the activity of substrates of the PI3K/Akt pathway by reverse phase protein array (RPPA) of two Akt substrates. Bad is phosphorylated by both PKA at S112 [74], and at S136 by Akt [75]. Whereas there was no significant difference between Bad S112 phosphorylation between DM and TM (Figure 4A),



phosphorylated S136 levels were lower in TM cells than in all other cells ( $p < 0.001$ , Figure 4B). It was not possible to reliably quantify these levels relative to Bad itself since Bad signals were unreliably  $< 3$  times background levels (not shown). One of the best attested substrates of Akt is glycogen synthase kinase 3 beta (GSK3 $\beta$ ), which is phosphorylated on S9 by Akt leading to inactivation of GSK3 $\beta$  [76]. Levels of phosphorylated GSK3 $\beta$  S9 were elevated in WT over MP cells, elevated once more by removing the inhibitory CK2 sites in the DM mutation, and reduced by the further mutation of Y180 in TM mutant cells (Figure 4C-E). These results strengthen the model that the PI3K/Akt pathway that is activated in DM cells requires phosphorylated PGRMC1 Y180, and is therefore attenuated in TM cells.

#### **PGRMC1 phosphorylation affects FAK activation and HSF levels**

Pathways mapping (Supplemental Information File 5) suggested that transcription factor HSF1 activity could be involved in the difference between WT v. DM (adjP=0.006). HSF1 has been linked with Focal Adhesion Kinase (FAK) activity [77], and FAK activity is dependent upon Rho/ROCK signaling which influences focal adhesion dynamics and tumor cell migration and invasion [78]. Reverse Phase Protein Array (RPPA) measurements showed that FAK1 tyrosine phosphorylation and increased HSF1 levels were all significantly elevated in WT and TM (Figure 4F-H). Notably, this profile resembled the differential proteomics profile of Figure 3, rather than the ROCK-dependent rounded morphology of Figure 1D.

#### **Enhanced DM cell motility requires vinculin**

Proteins involved with actin cytoskeleton were more abundant in DM cells (Figure S5A), one of which was vinculin (Figure S2A), an actin filament-binding protein associated with cell differentiation status, locomotion and PI3K/Akt, E-cadherin, and  $\beta$ -catenin-

regulated Wnt signaling in colon carcinoma [79, 80]. We attenuated vinculin levels in MP, WT, and DM cells via shRNA. MP and DM cells were obtained at first attempt, however, despite three attempts, WT cells could not be established. In the presence of scrambled shRNA control (shScr) DM cells exhibited elevated scratch assay motility relative to MP cells. However in anti-vinculin shRNA cells (shVNC), both MP and DM cell motility was reduced (Figure S5). These results are consistent with the observed elevated levels of proteins involved in the actin cytoskeleton (Figure S5A) contributing directly to the enhanced motility of DM cells (Figure 1F-G). However, that hypothesis remains untested except for vinculin.

### **PGRMC1 phosphorylation affects glucose uptake and lactate production:**

Figure 3 predicted altered glycolysis activity, which we investigated by glucose uptake and lactate production assays. Expression of all PGRMC1-HA proteins (WT, DM, and TM) led to significantly lower levels of both measures relative to MP, with DM cells exhibiting the lowest levels (Figure 5A-B), confirming that PGRMC1 phosphorylation status regulates glucose uptake and lactate production, and consistent with recently reported regulation of Warburg metabolism by PGRMC1 [55], which we confirm is regulated by PGRMC1 phosphorylation status.

### **PGRMC1 phosphorylation affects mitochondrial function**

Figure 3 also suggested that mitochondrial function may be affected by PGRMC1 phosphorylation status. Naphthalimide-flavin redox sensor 2 (NpFR2) is a fluorophore that is targeted to the mitochondrial matrix by a delocalized positive charge. Its fluorescence is elevated approximately 100-fold when oxidized and therefore provides a measure for the redox state of the inner mitochondrial matrix [81]. Cells treated with NpFR2 and assayed for fluorescence by flow cytometry revealed that the inner

mitochondrial matrix of WT and TM cells was more oxidizing than MP and DM cells (Figure 5C, D). This corresponded with the elevated expression of many nuclear-encoded mitochondrial proteins observed in Figure 3.

To investigate this situation, we examined mitochondria using the fluorescent marker MitoTracker, whose affinity for mitochondria is affected by mitochondrial membrane potential ( $\Delta\psi_m$ ) [82]. Flow cytometry revealed the presence of two populations of MitoTracker-binding cells in each cell type: low and high MitoTracker-binding (Figure 5E-G). These populations were approximately equal for MP, WT, and TM cells, however, DM cells exhibited overall lower relative fluorescence level in each population (Figure 5E-F) and a higher proportion of cells with higher MitoTracker binding (Figure 5E,G). Notably, higher levels of mitochondrial proteins in WT and to some extent TM cells apparently did not correspond with higher  $\Delta\psi_m$  caused by actively respiring mitochondria. Relative to MP cells, the maximal respiratory rate was reduced (between 2 and 3 fold in Figure 5H) by expression of DM or WT PGRMC1-HA, but not by TM cells (Figure 5H). The relative profiles of basal (Figure 5I) and maximal (Figure 5J) respiratory rates for WT and DM were similar, with TM exhibiting rates intermediate to those of MP. This profile was observed on three independent comparisons WT/DM/TM, each including measurements of three independently derived stable cell lines of each mutation. The single experiment including MP is shown. We conclude that the altered abundance of mitochondrial proteins due to PGRMC1 phosphorylation status detected in Figure 3 was accompanied by altered mitochondrial function. However, the relationship is not as simple as lower glucose uptake being associated with higher mitochondrial oxygen consumption, and may involve alterations in mitochondrial permeability to protons or other uncoupling mechanisms, for instance by altered cholesterol content [14]. The combination of higher glucose and mitochondrial oxygen consumption rates of MP and

WT cells is reminiscent of Warburg aerobic glycolysis, with DM cells exhibiting aerobic mitochondrial respiration, and TM being intermediate, with elevated glucose consumption but high oxygen consumption.

### **PGRMC1 phosphorylation affects mitochondrial morphology and function**

Possible differences in mitochondria due to altered protein expression or cell shape were explored by measuring mitochondrial content (area per cell), size (perimeter), and morphology, or form factor (FF). FF is a parameter derived from individual mitochondrial area and perimeter, where higher values correspond to a greater degree of filamentous than fragmented mitochondria [83, 84]. Representative images of mitochondria are shown in Figure 6A. No significant differences in mitochondrial number were detected between cell types (not shown). Over the entire data set, elongated cells exhibited greater mitochondrial area, larger mitochondria, and greater average FF (avFF) (Kolmogorov-Smirnov  $p < 0.0001$ ; not shown). When analyzed according to PGRMC1 status (cell type), MP and WT cells were predominantly elongated, and DM and TM were predominantly rounded, as expected (Figure 6A-B). We detected no significant differences in average mitochondrial area, perimeter or avFF between cell types for elongated cells, however rounded cell types exhibited significant differences between the cell types for area, perimeter, and avFF (Figure 6B). All cells with  $avFF < 2.2$  exhibited rounded cell shape, while all cells with  $avFF > 2.6$  exhibited elongated shape (Figure 6C). The observed avFF-associated transition from round to elongated cell shape was discrete for all cells except WT, occurring at  $avFF = 2.4$  (MP), 2.2-2.6 (WT), 2.7 (DM) and 2.6 (TM). Notably, the single elongated TM cell also exhibited the highest avFF value for TM (Figure 6C). Holo-tomographic time-lapse videos [85] for each cell type with mitochondria visible are provided as Supplemental Information File 9. We conclude that PGRMC1 phosphorylation status probably influences mitochondrial content, size, and FF (degree

of filamentation) by the same mechanisms that affect cell shape, consistent with the proposed influence of cytoskeleton on mitochondrial morphology and function [86].

### **PGRMC1 Y180 is required for subcutaneous mouse xenograft tumor growth**

No significant differences in cell proliferation were observed for cell types in culture as measured by IncuCyte live cell imaging (Figure 7A), or by repeated MTT viability assays (not shown). We established subcutaneous xenograft tumors in replicate mice carrying each of sub-lines 1-3 of WT, DM and TM (e.g. 4x line 1, 3x line 2, 3x line 3, n=13 per PGRMC1-HA condition), as well as n=5 mice with cells expressing the single Y180F mutant [44], or MP cells. We found that tumors produced by both TM and Y180F cells were significantly smaller than those produced by WT or DM cells (Figure 7B-C), indicating that PGRMC1 Y180 was required for optimal tumor growth, demonstrating that the cellular responses to altered PGRMC1 phosphorylation indeed influence cancer biology. All WT, DM, TM and Y180F tumor tissue expressed the PGRMC1-HA proteins (not shown), and therefore arose from the injected cells. There were no obvious differences in histology between cell types based upon hematoxylin and eosin staining (not shown).

## **DISCUSSION**

In this paper we report new biology regulated by the phosphorylation status of PGRMC1. Expression of the WT, DM, and TM PGRMC1-HA proteins from Figure 1A profoundly affected cell morphology and migratory behavior. The morphotypic change from WT to DM resembled MAT in MP cells, being sensitive to ROCKI (Figure 1D). The DM and TM altered morphology is dependent upon activated ROCK, which leads to stiffening of cortical actomyosin. That process promotes cell migration via rounded bleb-associated mode through sufficiently large pores that does not depend upon extracellular proteolysis

[87]. In human glioma cells over-expression of CD99 is implicated in MAT, resulting in rounded morphology, increased Rho activity, and enhanced migration [88]. These properties superficially resemble the phenotype of our DM cells (Figure 1C-E), however DM cell migration involved pseudopodia and cell adhesion as evidenced in cell migration videos (Supplemental Information File 1). Very little else is known at the molecular level about the events that promote MAT and altered cell motility [89-92]. We provide here a global expression study of a possibly MAT-related process, and show that PGRMC1 phosphorylation status dramatically affects mitochondrial morphology and function.

PGRMC1 influenced both cell shape and mitochondrial function and morphology (Figure 6). The elongated cell morphology that predominated in MP and WT cells was associated with a higher index of filamentous rather than fragmented mitochondria. Cells with rounded morphology and more fragmented mitochondria predominated in DM and TM cells (Figure 6). Such changes in mitochondrial function are driven by altered relative rates of mitochondrial fission and fusion, leading to mitochondrial fragmentation or elongated hypertubulation, respectively [93]. Fragmented mitochondria are associated with pathological conditions including cardiovascular and neuromuscular disorders, cancer, obesity, and the process of aging, associated largely with altered cell differentiation [93]. One of the proteins more abundant in WT and TM cells was Opa1 (O60313) (Supplemental Information File 6), a protein known specifically to regulate mitochondrial fission/fusion, and one that has been reported to interact directly with PGRMC1 [19]. PGRMC1 phosphorylation may alter mitochondrial morphology via Opa1.

The strongest driver of mitochondrial morphology appears to have been cell shape, or *vice versa* (Figure 6). The cytoskeleton is thought to influence mitochondrial function and

morphology [86], and proteomics pathways mapping suggested cytoskeletal changes. WT cells had elevated levels of Tubulin 1alpha (Q71U36), and decreased levels of Tubulin alpha-1C (Q9BQE3), Tubulin beta-2A chain (Q13885), Tubulin beta-4B chain (P68371) (Figure S2D) relative to DM cells. Rounded DM cells exhibited more abundant type II cytoskeletal keratin 8 (P05787), type I cytoskeletal Keratin 18 (P05783), and type I cytoskeletal Keratin 19 (P08727) relative to MP cells (which are epithelial markers [94]), with WT and TM cells exhibiting intermediate keratin levels (see Supplemental Information File 6 associated with Figure 3). These keratin abundance profiles paralleled the elevated levels of proteins in an enriched actin cytoskeleton pathway in DM cells (PC\_DB\_ID:144, Figure S2A).

DM cells also displayed elevated levels of proteins in the T-complex protein-1 ring complex (TRiC, also known as CCT) (Figure S2D), which contributes to folding of proteins including actin, microtubules, cyclins B and E, Von Hippel-Lindau tumour suppressor, and p21Ras, and is known to influence deregulated growth control, apoptosis, and genomic instability [95, 96], additionally contributing obligatory growth/survival functions in breast [97] and liver [98] cancers. This complex is highly likely to contribute to the altered cytoskeletal properties and rounded phenotype of DM cells. Strikingly in terms of the results of our present study, TCP1 (P17987, Figure S2D) expression is driven by oncogenic PI3K signaling in breast cancer [97], and we observe both PGRMC1-dependent elevated PI3K/Akt activity and TRiC protein abundances in DM cells (Figure S2D).

In summary, many of the mitochondrial differences observed could be attributable to altered cytoskeletal properties. However, the differential mitochondrial functions of Figure 5 did not correspond well with cell shape, indicating that PGRMC1 also changes

complex causative processes driven by more than mitochondrial morphology. Mitochondrial cholesterol levels could also contribute to the effect. PGRMC1 is important in sterol metabolism, and mitochondrial cholesterol decreases the permeability of the inner membrane to protons, increasing the efficiency of electron transport chain yield [14]. Further work will be required to explain the mechanisms underlying the observed responses, which we are currently exploring.

Closer analysis of the results depicted in Figure 3 (as presented in Supplemental Information File 5 and Supplemental Information File 6) revealed that both the ATP synthase subunit beta of the F1 catalytic domain as well as the F0 proton pore domain were up-regulated in WT cells relative to DM cells (Figure S2B). It is possible that the higher  $\Delta\psi_m$  of DM cells is related to low levels of F0/F1 ATPase proton channel (Figure S2B), resulting in relatively inefficient proton gradient clearance. Once again, altered membrane cholesterol levels could also influence  $\Delta\psi_m$  [14].

Proteomics profiling revealed many differentially abundant proteins involved in pathways particularly concerned with energy metabolism, and the recognition and translation of mRNA into protein (Figure 3, Supplemental Information File 5). Our interpretative model of these results is that WT cells elevated the levels of many enzymes involved in energy metabolism, and down-regulated the levels of proteins predicted to be involved in nucleosomal ribosome manufacture, mRNA recognition by ribosomes, and protein translation. Sabbir recently demonstrated the presence of SUMOylated PGRMC1 primarily in nuclear cell fractions [55], and Terzaghi et al. [22] confirmed a nucleolar localization for PGRMC1, where it was responsible for nuclear localization of nucleolin which they proposed was associated with stress response. The zebrafish knockout of PGRMC1 results in elevated levels of mPR $\alpha$  mRNA, but decreased levels of the



corresponding protein [99], suggesting that PGRMC1 can indeed affect the translational efficiency of certain mRNAs by ribosomes, which is consistent with our pathways analysis results, and especially the principal components analysis of Figure S1 which predicts that ribosomes and translation contributed most to the differences between cells.

Pathways enrichment suggested that PI3K/Akt signaling was higher in DM and lower in TM cells, which suggested that PI3K/Akt signaling required Y180 for activity (Figure 3, Figure S2B). PGRMC1 has long been recognized as a modulator of Akt activity (and downstream PI3K), with cell type-specific effects [13, 41, 44, 45, 100-102]. Modulation of Akt activity was confirmed by assaying phosphorylation of Akt substrates (Figure 4B,E-F). This predicted activation of signals by removal of the putative inhibitory CK2 consensus sites in the DM protein [5, 44] was dependent upon Y180 because the triple mutant S57A/Y180F/S181A (which differs from DM by a single oxygen atom) exhibited a protein expression profile and metabolism that was more similar to WT than DM (Figure 3). These changes were accompanied by altered glycolysis and mitochondrial function (Figure 5), and reduced growth of subcutaneous tumors (Figure 7). In a methylomics study of these cells in an accompanying paper, the most significantly down-regulated KEGG pathway in the TM/DM comparison was hsa04151 (PI3K-Akt signaling pathway) [65], strengthening the case for PI3K/Akt activation via PGRMC1 Y180.

Interestingly, PGRMC1 knockdown in hPSCs led to an increase in GSK3 $\beta$  inhibitory phosphorylation [51]. That merits examination of PGRMC1 phosphorylation status in that system, where PGRMC1 suppressed the p53 and Wnt pathways to maintain stem cell pluripotency. Similarly to our results, those authors concluded that “that PGRMC1 is able to suppress broad networks necessary for multi-lineage fate specification.” Our hypothesis suggests that PGRMC1 Y180 phosphorylation and PI3K/Akt activity could

be associated with elevated GSK-3 $\beta$  Ser9 phosphorylation and  $\beta$ -catenin signaling in some cancers [80].

Our initial hypothesis related to differential phosphorylation of PGRMC1, being potentially spatially and temporally associated with the onset of glucose-dependent metabolism (Warburg effect) [44]. While this manuscript was in preparation, Sabbir showed that PGRMC1 post-translational modification status in HEK293 cells changes in response to P4 treatment, which was accompanied by a PGRMC1-dependent increase in glycolysis [55]. Because the phospho-acceptor amino acid Y180 has been conserved in PGRMC1 proteins since early animal evolution [6, 7], we believe it likely that PGRMC1 Y180-regulated modulation of metabolic and growth control that we have manipulated could represent a major newly identified foundational axis of animal cell biology whose perturbation is inconsistent with the maintenance of differentiated states acquired during the subsequent evolution of complex body plans.

## **Conclusion**

We show that PGRMC1 phosphorylation status exerts higher order influence over a wide range of clinically important measures of cell biology. Although we can confidently deduce the existence of a PGRMC1 signal network, as yet we have identified neither immediate upstream PGRMC1 effectors nor downstream targets. PGRMC1-like proteins have possessed the cognate of phosphoacceptor Y180 since the appearance of early animals, and the increasing complexity of cellular adaptation to multicellular life during animal evolution has been associated with the acquisition of an increasingly sophisticated retinue of phosphorylation sites surrounding Y180, and elsewhere in the protein [6]. The stem cell-like zygote (most similar animal cells to the unicellular animal ancestor) expresses cross-phylum conserved genes involved in processes such as cell cycle, mitosis,

and chromatin structure [103]. All of these processes can be influenced by PGRMC1 [3]. During animal development later embryological stages involve the induction of conserved germ layer-specific genes such as those for muscle [103]. This may be related to DM actin biology seen in our system, and suggests the hypothesis that CK2-like-site mediated negative regulation of PGRMC1 could be involved in these embryological processes, which merits further investigation. We propose that PGRMC1 phosphorylation status, especially of the motif surrounding Y180, dramatically regulates cellular identity-conferring mechanisms with deep evolutionary history relating to bilateral animal origins, such as the stem cell-associated anaerobic/glycolytic metabolism of the Warburg effect [55, 56]. As such, we predict that these processes could be involved in a wide range of human pathologies, and are particularly pertinent to cancer biology. Future studies should urgently explore the relationship between PGRMC1 signaling and diseases such as cancer, diabetes, Alzheimer's disease, and others [3]. The novel and highly pleiotropic nature of the PGRMC1 signaling system [3] means that it could potentially contain new avenues for pharmaceutical interventions. In an accompanying paper [65], we show that the cells characterized in this paper differ dramatically in genomic methylation and mutation rates.

## **MATERIALS AND METHODS**

### **Plasmid preparation**

Plasmids pcDNA3.1-PGRMC1-HA (wild type: WT), pcDNA3.1-PGRMC1-HA\_Y180F (Y180F), pcDNA3.1-PGRMC1-HA\_S57A/S181A (double mutant, DM) and pcDNA3.1-PGRMC1-HA\_Y180F (Y180F) [44] have been described. The triple mutant S57A/Y180F/S181 (TM) was constructed by Genscript (Honk Kong) using the DM plasmid as the template and introducing codon TTC for F180. PGRMC1-HA open reading frames were reconfirmed by DNA sequencing at Monash Micromon DNA

Sequencing Facility (Clayton, Vic., Australia) using the 5' T7 and 3' BGH sequencing primers specific for the parental vector. PGRMC1-HA plasmids were transformed into *Escherichia coli* Top10 strain, and cultured overnight at 37°C on 1% agar plates containing Luria broth (LB) media (Invitrogen) and 50 µg/mL ampicillin. A single colony was picked and bacteria were grown in 250 ml culture by aeration overnight at 37°C in LB media. Plasmid DNA was isolated by GeneJet Maxiprep Kit (ThermoScientific) following the manufacturer's protocol. Plasmid DNA concentration was measured by using Nanodrop (Thermo Scientific).

### **Cell culture**

MIA PaCa-2 (MP) cell identity was verified as MIA PaCa-2 (ATCC CRL-1420) by the MHTP Medical Genomics Facility (Monash University, Melbourne) following the ATCC Standards Development Organization document ASN-0002 for cell line identification via short tandem repeat profiling. MP cells were maintained in Dulbecco's Modified Eagle's medium (DMEM-high glucose, Sigma-Aldrich, D5796) supplemented with 10% Foetal bovine calf serum (Sigma-Aldrich, F9423) and 1% penicillin-streptomycin (Sigma-Aldrich, P4333) (complete DMEM) at 37°C and 5% CO<sub>2</sub> in a 150i CO<sub>2</sub> incubator (Heracell, Lane Cove NSW). Cell doubling times were estimated by 3-(4,5-dimethylthiazolyl-2)-2,5-diphenyltetrazolium bromide (MTT) assay or by IncuCyte, as described [104].

### **Transfection and stable cell line generation:**

Under our culture conditions, MP cells exist in culture as flattened adherent cells of mesenchymal shape, a minority of rounded adherent cells, and a small population of rounded suspension cells. Plating the suspension cells regenerates a similar population distribution (not shown). On the day before transfection,  $2 \times 10^6$  MP cells were seeded onto a 6-well plate. The cells were transfected at 70-80% confluency. Before transfection, cells were washed with Dulbecco's phosphate-buffered saline (PBS, Sigma-Aldrich, D8537) and maintained in antibiotic-free Dulbecco's Modified eagle Medium high glucose (DMEM, Sigma-Aldrich, D5796) containing 10% bovine calf serum (Sigma-Aldrich, 12133C) and 1% penicillin/streptomycin (Sigma-Aldrich, P4458) (complete DMEM). In separate transfections, 4µg each of respective PGRMC1-HA plasmids (WT, DM or TM) and Lipofectamine 2000 (Life Technologies, 11668-019) were mixed at 1:2 ratio and incubated for 25 min at room temperature. The mixture was then added drop-wise to the

wells of the culture plate. After 6 hours of incubation, cells were washed with PBS and cultured at 37°C and 5% CO<sub>2</sub> in complete DMEM for 48 hours, after which cells were harvested and plated in three fold limiting dilution in complete DMEM containing 50 µg/ml Hygromycin B (EMD Millipore, 400052) in 96 well plates. Cells were cultured at 37°C and 5% CO<sub>2</sub> for 2 weeks, with regular media changes containing complete DMEM with Hygromycin B every 3 days to select for stable integration events. Typically 8 independent stably transfected cell lines were expanded for each of PGRMC1-HA WT, DM and TM and 3 lines with similar levels of PGRMC1-HA expression were selected by Western blot.

Cells were frozen 0.5 – 1.0 mL at -80°C in Bambanker (Novachem, #306-14684) at 2x10<sup>6</sup> cells/mL. Frozen cells were introduced back into culture by thawing at 37°C for 20 seconds followed by addition to 5 ml of complete media and low speed centrifugation at 180 x g for 3 mins at 25°C. Pelleted cells were resuspended in 6mL fresh complete media and seeded in 25 cm<sup>2</sup> flasks.

### **shRNA lentiviral production**

Lentiviral-delivered shRNAs were constructed using Mission TRC2-pLKO-Puro series lentiplasmids (SHCLND, Sigma-Aldrich) targeting ERR1/ESRRA (TRCN0000330191, GAGAGGAGTATGTTCTACTAA), vinculin (VCL) (TRCN0000290168, CGGTTGGTACTGCTAATAAAT) or non-target scrambled shRNA (shScr) (SHC202; CAACAAGATGAAGAGCACCAA). To generate virus particles, we co-transfected HEK293 cells with the shRNA plasmids and helper plasmids using Lipofectamine 2000 (Invitrogen, 11668-027). Prior to transfection, 6 well plates were treated with 50µg/mL D-Lysine overnight. Next day, 1x10<sup>6</sup> HEK293 cells were seeded per well and incubated overnight at 37°C in complete medium. Transfection mixture A contained 4 µg plasmid mixture consisting of 2.5 µg target or shScr shRNA lentiplasmid, 0.75 µg Pax, 0.3µg Rev and 0.45µg VSV-G helper plasmids [105] in 250 µL antibiotic-free medium. Transfection mixture B contained 8 µL Lipofectamine and 242 µL antibiotic-free medium. After 5 min incubation at 25°C, mixtures A and B were gently mixed and incubated for 25 min at 25°C. HEK293 culture medium was removed, cells were washed with PBS, and 2 mL fresh antibiotic-free medium was added followed by addition of combined transfection mixture to the cells, dropwise with gentle shaking, followed by incubation for 6 h at 37°C. After incubation, the medium was replaced with complete medium overnight at 37°C. Virus particles were harvested by collecting culture medium followed by the addition of

new medium every 24 h for 72 h. Collected media for each culture were pooled, filtered through a 22  $\mu$ M filter, aliquoted into 1 mL fractions, and frozen at  $-80^{\circ}\text{C}$ .

### **shRNA lentiviral transduction**

Briefly,  $1 \times 10^5$  MP, WT, or DM cells per 24 plate well were seeded in 1 mL complete DMEM medium and grown to 60% confluency. The medium was removed, and replaced by 1 mL of medium per well, containing 2-fold serially diluted virus particles in adjacent wells, plus 5  $\mu\text{g}/\text{mL}$  Polybrene (hexadimethrine bromide, Sigma-Aldrich 107689) to enhance viral transduction. After incubation for 24 hours, the medium was removed and the cells were washed twice with PBS after which fresh medium was added supplemented with 1.5  $\mu\text{g}/\text{mL}$  Puromycin, which was replaced every 48 h for 1 week. Cells from wells transduced with the lowest dilutions of respective virus particles that survived selection were expanded, and stocks frozen at  $-80^{\circ}\text{C}$  in Bambanker.

### **Scratch migration assay**

MP cells or stable transfected monoclonal MP cell lines expressing PGRMC1-HA WT, DM or TM proteins ( $1 \times 10^4$  cells) were seeded in a 24 well plate. The monolayer of cells at more than 90% confluency was subjected to serum starvation for 2 hours. A scratch was created in the middle of the monolayer by a sterile p200 tip and washed twice with PBS to remove floating cells. Complete media was then added. The cell monolayer was incubated for 36 hours to allow cell migration into the scratched area. Photographic images were taken at 0 and 36 hours using an inverted phase microscope (Nikon Eclipse Ti-U). Cells in the boxed areas of Figure 2A were manually scored from printed images. Cell treatments included 125 nM Y-27632 dihydrochloride (Abcam, ab120129, Rho Kinase inhibitor: ROCK1) or vehicle control (DMSO). For video files the cells were incubated at  $37^{\circ}\text{C}$  and 5%  $\text{CO}_2$  for 36 hr in a stage top electrically heated chamber (Okolab H301-NIKON-NZ100/200/500-N) including transparent heated lid (H301-EC-HG-LID), with a 24-well Nunc/Greiner plate base adapter (24MW-NUNC) and a chamber riser, for a working distance of 28 mm. The chamber was regulated by a Control Unit (Okolab H301-TC1-HMTC) with Digital  $\text{CO}_2$  controller (Okolab DGT- $\text{CO}_2$  BX) and Air Pump (Okolab, OKO-AP) and was inserted to a Nano-Z100-N Piezo stage (Mad City Labs) on a motorized XY stage (Nikon TI-S-ER). Images were taken every 10 minutes for 36 hours with a  $10\times$  (0.45 NA) Plan Apo objective using the transmitted light

detector (TD) on a Nikon Ti Eclipse Confocal microscope controlled by NIS Elements V4.10 software (Nikon).

### **Proteomics sample preparation**

Three independent stable transfected lines of each PGRMC1-HA-expressing cell type, as well as triplicates of the MP parental cell line, were measured in technical replicate data-dependent and independent data acquisition SWATH-MS modes on a 5600 TripleTof™ mass spectrometer (ABSciex). Global proteomics analysis was carried out at the Australian Proteome Analysis Facility (APAF). Cells were grown in Wagga Wagga to 80% confluency in 75 cm<sup>2</sup> flasks. Three separate cultures of MP cells (passages 8, 9 & 11) and three lines of each PGRMC1-HA WT, DM and TM cells were used (independent biological triplicates). Cells were harvested and frozen cell pellets were shipped on dry ice to APAF for Mass spectrometric analysis. Cell pellets were lysed using 200 µL of sodium deoxycholate buffer (1% in 0.03M triethyl ammonium bicarbonate), and DNA digested using 0.5 µg of benzonase. Direct detect assay (EMD Millipore, DDAC00010-8P) was performed on the samples and 100 µg of each sample was taken for digestion. Samples were reduced with dithiothreitol (5 mM), alkylated with iodoacetamide (10 mM) and then digested with 4 µg trypsin for 16 hours at 37°C. The digested sample was acidified and centrifuged to remove the sodium deoxycholate. Samples were then dried and resuspended in 100 µL of loading buffer (2% acetonitrile 0.1% formic acid). Individual samples for SWATH analyses were diluted 1:4 into loading buffer and transferred to a vial. Each sample was measured in technical replicate. For IDA runs a pool was made for each group (MP, WT, DM, and TM) by taking equal portions from each biological replicate and diluting 1:4 in loading buffer.

### **Proteomic Information dependent acquisition**

Tryptic peptides were analyzed on a 5600 TripleTof™ mass spectrometer (ABSciex). Chromatographic separation of peptides was performed on a NanoLC-2Dplus HPLC system (Eksigent, Dublin, CA) coupled to a self-packed analytical column (Halo C18, 160Å, 2.7 µm, 75 µm x 10cm). Peptide samples (4 µg of total peptide amount) were loaded onto a peptide trap (Opti-trap Cap 0.5mm x 1.3mm, Optimize Technologies) for pre-concentration and desalted with 0.1% formic acid, 2% ACN, at 10 µL/min for 5 minutes. The peptide trap was then switched into line with the analytical column and

peptides were eluted from the column using linear solvent gradients with steps, from 98% Buffer A (0.1% formic acid) and 2% Buffer B (99.9% acetonitrile, 0.1% formic acid) to 90% Buffer A and 10 % Buffer B for 10 minutes, then to 65% Buffer A and 35% Buffer B at 500 nL/min over a 78 min period. After peptide elution, the column was cleaned with 95% Buffer B for 15 minutes and then equilibrated with 98% Buffer A for 15 minutes before the next sample injection. The reverse phase nanoLC eluent was subject to positive ion nanoflow electrospray analysis in an IDA mode. Sample analysis order for LC/MS was DM1, DM2, DM2, DM3, DM3, MP2, MP2, MP3, MP3, TM2, TM2, TM3, TM3, WT1, WT1, WT2, WT2, WT3, WT3, DM1, MP1, MP1, TM1, TM1.

In the IDA mode a TOFMS survey scan was acquired ( $m/z$  350 - 1500, 0.25 second), with the 10 most intense multiply charged ions ( $2^+$  -  $5^+$ ; counts >150) in the survey scan sequentially subjected to MS/MS analysis. The selected precursors were then added to a dynamic exclusion list for 20s. MS/MS spectra were accumulated for 50 milliseconds in the mass range  $m/z$  100 – 1500 with rolling collision energy.

### **Proteomic Data independent acquisition (SWATH)**

Samples were analyzed in duplicate, with the chromatographic conditions as for IDA analysis above. The reverse phase nanoLC eluent was subject to positive ion nanoflow electrospray analysis in a data independent acquisition mode (SWATH). For SWATH MS,  $m/z$  window sizes were determined based on precursor  $m/z$  frequencies ( $m/z$  400 – 1250) in previous IDA data (SWATH variable window acquisition, 60 windows in total). In SWATH mode, first a TOFMS survey scan was acquired ( $m/z$  350-1500, 0.05 sec) then the 60 predefined  $m/z$  ranges were sequentially subjected to MS/MS analysis. MS/MS spectra were accumulated for 96 milliseconds in the mass range  $m/z$  350-1500 with rolling collision energy optimized for lower  $m/z$  in  $m/z$  window +10%. To minimize instrument condition caused bias, SWATH data were acquired in random order for the samples with one blank run between every sample.

### **SWATH library generation**

The LC-MS/MS data of the IDA data were searched using ProteinPilot (version 4.2) (Sciex) and combined into a single search report file. The files were searched against Human entries in the Swissprot 2014\_04 database (released 16/04/2015, containing



545,388 entries). The search parameters were selected as follows: iodoacetamide cysteine alkylation, trypsin digestion, Triple TOF 5600 instrumentation, biological modifications, thorough search and false discovery rate enabled.

### **SWATH data processing**

SWATH data were extracted using PeakView (version 2.1, Sciex) with the following parameters: Top 6 most intense fragments of each peptide were extracted from the SWATH data sets (75 ppm mass tolerance, 10 min retention time window). Shared peptides were excluded. After data processing, peptides (max 50 peptides per protein) with confidence  $\geq 99\%$  and FDR  $\leq 1\%$  (based on chromatographic feature after fragment extraction) were used for quantitation. The extracted SWATH protein peak areas were normalized to the total peak area for each run and subjected to T-Test to compare relative protein peak area between the samples. Protein T-Test with  $p$ -value smaller than 0.05 and fold change larger than 1.5 were highlighted as differentially expressed. The analysis of four different cell types was treated as six separate paired comparisons: 1) MP vs. WT, 2) MP vs. DM, 3) MP Vs. TM, 4) WT vs. DM, 5) WT vs. TM, and 6) DM vs. TM. Additionally, a similar method for determining differential expression was run at the peptide level, with the peptide level fold changes then averaged for each protein. The peptide level analysis is more conservative, as peptide level  $p$ -values are only generated when a protein was identified by at least two proteins. Peptide level data were used for this study. The mass spectrometry proteomics data have been deposited to the ProteomeXchange Consortium via the PRIDE [106] partner repository with the dataset identifiers PXD014716 (Figure 3) and PXD014789 (Figure S4). Identical methods were employed to quantify effects of the shRNA-mediated attenuation of ERR1 versus scramble shRNA expression.

### **WebGestalt enrichment analyses**

Gene Ontology (GO) and pathway enrichment analysis were conducted on differentially abundant proteins from Figure S2C using the WEB-based GENE SeT AnaLYsis Toolkit (WebGestalt) platform (<http://bioinfo.vanderbilt.edu/webgestalt/>) [70]. Figures or Supplementary Figures depicting or relying on WebGestalt results describe supplementary data files available online that contain the respective original WebGestalt analysis files. Attempting to identify the most important driving contributions to the

phenotypic alterations observed, a complementary WebGestalt analysis was also performed at the  $\text{adj}P < 0.001\%$  level, but employing the subsets of proteins which were detected to be either significantly up- or down-regulated (“red” and “blue” lists of proteins for each comparison from Supplemental Information File 1). The UniProt protein IDs from respective proteomics comparisons were uploaded as text files which accompany the respective WebGestalt supplementary data files. KEGG, Pathway Commons, and Wiki Pathways were analyzed at the 5% level. GO and transcription Factor analyses were also performed for comparisons of differentially up- or down-regulated proteins for each pair-wise comparison between cell types at the 0.1% and 10% levels. The following WebGestalt settings were employed: Organism: hsapiens; gene Id Type: entrezgene; Reference Set for Enrichment Analysis; entrezgene\_protein-coding; Significance Level: (variable see individual analysis descriptions), Statistical Method: Hypergeometric, Multiple Test Adjustment: Benjamini-Hochberg (BH), Minimum Number of Genes for a Category: 3.

Pathway enrichment analyses can consider either a) all differential proteins together (including both up- and down-regulated proteins in the one analysis), or b) can examine the higher abundance and lower abundance proteins in separate analyses for each comparison (“red” or “blue” analyses for each comparison). Our WebGestalt pathway analysis strategy of Figure 3 pursued the second of these alternatives. In the first analysis, all proteins found to be differential (both up- and down-regulated) between two samples in any six of the analyses were entered as a protein list to WebGestalt, and pathway enrichment analysis was performed with multiple sample correction at the Benjamini and Hochberg (BH) adjusted p ( $\text{adj}P$ ) significance level of 0.001 for KEGG, Pathway Commons, and Wikipathways for each of the six basic cell-type comparisons.

Twelve separate WebGestalt analyses were performed for Figure 3, with enrichment analyses including KEGG, PC, WikiPathways, as well as Transcription Factor and GO cellular component. The schematic representation of Figure 3 shows pathways identified as significantly enriched for at least one of 12 comparisons (6x more abundant “red” and 6x less abundant “blue”) between 1) MP vs. WT, 2) MP vs. DM, 3) MP vs. TM, 4) WT vs. DM, 5) WT vs. TM, and 6) DM vs. TM. The original WebGestalt analyses at  $\text{adj}P < 0.001$  are available as Supplemental Information File 7. The pathway mapping for all significantly detected features between all comparisons

detected at  $\text{adj}P < 0.001$  is available as Supplemental Information File 5A. Another WebGestalt analysis was performed at  $\text{adj}P < 0.1$  (available as Supplemental Information File 8) and the significances of each pathway identified in Supplemental Information File 5A at the  $\text{adj}P < 0.001$  level were then recorded for all comparisons at the  $\text{adj}P < 0.1$  level in Supplemental Information File 5B. The analysis results are presented for reference as Supplemental Information File 4B as drawn from Supplemental Information File 7. That information was used to assign statistical significance in the pathways map for all features that were identified at the  $\text{adj}P < 0.001$  level in any one comparison, across all 12 comparisons at the  $\text{adj}P < 0.1$  level. These data were then used to map all proteins from all pathways and all comparisons of Supplemental Information File 5B to produce the original image of Figure 3 in Microsoft Excel, which is available as Supplemental Information File 6 and contains all protein and pathway identities.

### **Mapping pathways to the expression heat map**

The matrix of protein membership to pathway or functional group category is a resulting sparse matrix with 0/1 indicating that the respective protein is/is not present in the respective category. This matrix was clustered using the `hclust` implementation in the R Base Package ([www.r-project.org/](http://www.r-project.org/)), using a binary distance and complete linkage, to reorder the columns (pathways in this case) according to the proportion of shared proteins. The resulting cladogram including overlapping features identified by all WebGestalt analyses appears to the right of pathways in Figure 3, and with complete accompanying protein and pathway identities in Supplemental Information File 5.

### **Principal Components Analysis on Proteomics results**

Principal component analysis was used to examine the largest contributions to variation in the protein measurements. Wilcoxon rank-sum tests were used to identify the pathways that were positively or negatively associated with the principal component scores.

### **Sample Preparation for Western blots**

Approximately 70% confluent cells in a T75 flask were washed twice with chilled PBS buffer and incubated with 500  $\mu\text{L}$  radio immunoprecipitation assay buffer (RIPA buffer)

(Sigma-Aldrich, R0278) supplemented with protease and phosphatase inhibitor cocktail (Thermoscientific, 88668) following manufacturer's recommendations. After scraping, the lysate was centrifuged at 8000g for 20 minutes (Hermle Centrifuge Z233 M-2) at 4°C. Protein concentration was determined using the Pierce BCA protein assay kit (ThermoFisher, 23225) following the manufacturer's instructions. 20 µg cell lysates were each mixed with 2x Laemmli loading buffer (Sigma-Aldrich, S3401) at a 1:1 ratio to give final volume 20 µL, followed by denaturation at 95°C for 5 minutes in a digital dry bath heater. Lysates were loaded immediately to a 10% SDS-PAGE gel. For HA western we used 17 well gels (Life technologies, NW04127), for PGRMC1 Western blots we used 15 well gels (Bio Rad. 456-1069), for vinculin and ERR1 Western blots we used 10 well gels (Bio Rad 456-1096). Electrophoresis was at 150V for 45 min. Protein was transferred onto PVDF membranes (Bio-Rad, 1620174) with a Trans-Blot Turbo transfer system (Bio-Rad, Gladesville NSW) for 7 min by Trans-Blot® Turbo RTA Mini LF PVDF Transfer Kit (Bio-Rad, 1704274) or wet transferred in 25 mM Tris, 192 mM glycine, 20% (v/v) methanol (pH 8.3) (1x Towbin buffer) at 20V for 2.5 hours on mini trans-blot cell (Bio Rad, 1703930) cooled on ice.

### **Western blots**

Membranes were blocked with TBS-T (0.1% Tween-20 in 1× Tris-buffered saline) containing 5% Woolworths Instant Skim Milk Powder (Woolworths, Wagga Wagga, NSW, Australia) for 1 hr and incubated overnight at 4°C with primary (1°) antibody. After washing 3 times with TBS-T, blots were incubated with secondary (2°) antibody for 1 hr at room temperature. Proteins were detected by the following methods. For chemiluminescence detection the membranes were incubated with Clarity Max Western ECL Substrate (Bio-Rad, #1705062) for 5 min for detection by enhanced chemiluminescence using a Bio-Rad ChemiDoc MP imaging system (Bio-Rad, Gladesville NSW). Fluorescence detection was performed on the ChemiDoc (at the indicated wavelength). Molecular weight standard proteins for gels imaged for fluorescence or chemiluminescence were detected on the ChemiDoc using the IRDy680 channel. Colorimetric detection (Vinculin and ERR1 Western blots) was performed by incubation of membranes with 3 mL Tetramethylbenzidine (TMB) (Sigma-Aldrich, T0565) for 5 minutes. These images were captured by Molecular Imager Gel Doc XR+ System (Bio-Rad, Gladesville NSW). Multi-channel ChemiDoc images were generated with the Bio-Rad Image Lab Software. Some dual channels images were manipulated in

Adobe Photoshop CC 2018 (Adobe Systems Inc.) by reducing intensity in either red or green channel to lower background in the published image. Adjustments were applied identically over all image pixels so as to not alter the relative intensities of any bands.

The following primary (1°) and secondary (2°) antibody pairs were used (at the specified dilutions) with the indicated detection methods. For PGRMC1 Western: 1° goat anti-PGRMC1 antibody (Abcam, ab48012) (1:1000) and 2° rabbit anti-goat secondary antibody (Abcam, ab6741) (1:4000) detected by chemiluminescence. After detection, membranes were blocked with TBS-T overnight and then incubated with 1° mouse anti-beta actin (Sigma-Aldrich, A5541) (1:2000) and 2° goat anti-mouse IgG H&L (IRDye 800CW) (1:5000) detected by fluorescence (IRDye 800CW). For HA epitope Western: 1° mouse anti-HA (Sigma-Aldrich, H3663) (1:2000) and 2° goat anti-mouse IgG H&L (IRDye 800CW) (dilution 1:5000) detected by fluorescence (IRDye 800CW), as well as 1° rabbit anti-beta-actin (Cell Signaling, 4967) (1:2000) and 2° donkey anti-rabbit IgG (Abcam, ab16284) (1:2000) detected by chemiluminescence. For vinculin Western: 1° anti-vinculin (E1E9V) XP (Cell Signaling Technology, 13901) (1:1000) and 2° donkey anti-rabbit IgG (Abcam, ab16284) (1:2000) detected colorimetrically. For ERR1 Western: 1° rabbit anti-ERR $\alpha$  (E1G1J) (Cell Signaling, 13826S) (1:1000) and 2° donkey anti-rabbit IgG (Abcam, ab16284) (1:2000) detected colorimetrically.

### **Reverse Phase Protein Array analysis**

Reverse Phase Protein Arrays (RPPA) using Zeptosens technology (Bayer AG, Leverkusen, Germany) were used for analysis of signaling protein expression and activity profiling as described [107-110]. For the analysis, flash frozen cell pellets were lysed by incubation with 100  $\mu$ l cell lysis buffer CLB1 (Bayer, Germany) for 30 minutes at room temperature. Total protein concentrations of the lysate supernatants were determined by Bradford Assay (Coomassie Plus, Thermo Scientific). Cell lysate samples were adjusted to uniform protein concentration in CLB1, diluted 10-fold in RPPA spotting buffer CSBL1 (Bayer) and subsequently printed as series of four dilutions (starting concentration at 0.3  $\mu$ g/ $\mu$ l plus 1.6-fold dilutions) and in two replicates each. All samples were printed as replicate microarrays onto Zeptosens hydrophobic chips (Bayer) using a NanoPlotter 2 (GeSim, Grosserkmannsdorf, Germany) applying single droplet depositions (0.4 nL volume per spot). After printing, the microarrays were blocked with 3% w/v albumin, washed thoroughly with double

distilled H<sub>2</sub>O, dried in a stream of nitrogen and stored in the dark at 4°C until further use.

Protein expression and activity levels were measured using a direct two-step sequential immunoassay and sensitive, quantitative fluorescence read-out. A single array was probed for each protein. Highly specific and upfront validated primary antibodies were incubated at the respective dilution in Zeptosens assay buffer overnight (15 hours) at room temperature. Arrays were washed once in assay buffer and incubated for 45 minutes with Alexa647-labeled anti-species secondary antibody (Invitrogen, Paisley, UK). Arrays were then washed as before and imaged using a ZeptoREADER instrument (Bayer) in the red laser channel. Typically, six fluorescence images were recorded for each array at exposure times of between 0.5 and 16 seconds. Negative control assays incubated in the absence of primary antibody (blank assays) were also performed to measure the non-specific signal contributions of the secondary antibody. In addition, one chip out of the print series was stained to measure the relative amount of immobilized protein per spot (protein stain assay). The following primary antibodies (provider and reagent number, dilution) were used: Bad (CST 9239, 1:200), Bad-P-Ser112 (CST 5284, 1:100), Bad-P-Ser136 (CST 4366, 1:100), FAK1-P-Tyr577 (Invitrogen 44-614ZG, 1:100), FAK1-P-Tyr861 (Epitomics 2153-1, 1:100), GSK3beta (CST 9315, 1:200), GSK3beta-P-Ser9 (CST 9336, 1:100), HSF1 (Epitomics 2043-1, 1:1000).

After assay measurements (one protein per array), array images and data were analyzed with the software ZeptoVIEW 3.1 (Bayer). For each array/antibody, the image taken at the longest exposure time without showing any saturation effect was analyzed with the spot diameters set to 160 µm. Mean fluorescence signal intensity (MFI) of each sample was calculated from referenced, background-corrected mean intensities of the single spots (eight spots per sample) applying a linear fit and interpolating to the mean of the four printed protein concentrations. Blank-corrected MFI signals of the samples were normalized for the relative protein concentration printed on the chip to obtain normalized fluorescence intensity signals (NFI). NFI values were used for all subsequent statistical analyses.

### **Glucose uptake & Lactate production assay**

Glucose uptake and lactate production assays were performed by using commercially available kits from Cayman chemical (#600470, #700510) following manufacturer's protocols. Glucose uptake was measured with a Fluostar Omega fluorescence microplate reader (BMG Labtech, Ortenberg, Germany) and lactate production was quantified with a Molecular Devices Spectra Max 190 microplate reader (Bio-Strategy P/L, Campbellfield, Vic., Australia).

### **NpFR2 redox assay**

Intramitochondrial redox status was measured by naphthalimide flavin redox sensor 2 (NpFR2) [81]. Mia PaCa-2 and PGRMC1-HA-expressing stable cells ( $1 \times 10^6$ ) were suspended in 2 mL complete media and seeded in six well plates and cultured for 24 hr at 37°C and 5% CO<sub>2</sub>. Cells were washed with PBS, trypsinised, harvested, and resuspended in 1 mL of fresh media containing 25µM NpFR2 in a 1.5 mL microcentrifuge tube, followed by incubation for 20 min at 37°C. Cells were then centrifuged in a microcentrifuge at 180 x g, the pellet was resuspended once with 1 mL PBS followed by recentrifugation, and the washed pellet was again resuspended in 1 mL PBS. 500 µL cell suspension was loaded to a Gallios Flow Cytometer (Beckman Coulter) and fluorescence of  $2 \times 10^4$  cells was detected using FL1 (green) channel.

### **Immunofluorescence microscopy**

To detect the expression of exogenous HA tagged PGRMC1 in Figure 1E, cells were seeded on coverslips on a six well plate. The cells were washed with ice-cold PBS, mildly fixed with 3.7% formaldehyde for 5 minutes at 4°C. The cells were then permeabilized with ice-cold 100% methanol for 10 minutes at -20°C, followed by overnight incubation with anti-HA tag antibody (Sigma, H3663). The cells were washed extensively and incubated with FITC conjugated secondary antibody (Sigma, F8521) in dark for 1 hour at 4°C. Cells were washed three times with PBS and counterstained with DAPI mounting solution. Images were captured using a Nikon Ti Eclipse Confocal microscope (Nikon Australia Pty Ltd).

### **Analysis of mitochondrial morphology**

Mitochondria were quantified for cell shape (elongated/round), mitochondrial content (sum of mitochondrial area/cell), mitochondrial size (average perimeter/cell), and mitochondrial morphology or Formfactor (FF): a measure where higher values correspond to a greater level of filamentous mitochondria and lower values correspond to more highly fragmented mitochondria [84]. Formfactor (calculated as the  $P^2/4\pi A$ ) measures mitochondrial morphology based on the perimeter and area of shape. The calculation takes in to account not only changes in length, but also the degree of branching, making it an ideal form of measurement for the quantification of mitochondrial morphology.

To measure form factor,  $1 \times 10^5$  cells were seeded onto Nunc 176740 four well plates with a 22x22mm #1.5 glass coverslip on the bottom. Cells were fixed and permeabilized as above, then incubated with Abcam mouse anti-mitochondrial IgG1 antibody (Abcam ab3298) and then with FITC-conjugated goat anti-mouse secondary antibody (Sigma-Aldrich F4018) and DAPI, followed by phalloidin red staining and imaged with 3D-Structured Illumination Microscopy (SIM) on a DeltaVisionOMX Blaze microscope as described [111]. Images were processed using Fiji/ImageJ software [112], and Area and Perimeter values were extracted to calculate form factor. Cell morphology was scored as either 'round' or 'elongated' by JCC as part of the mitochondrial quantification process.

### **Holo-tomographic imaging**

Holo-tomographic video imaging was performed on a NanoLive (Switzerland) 3D Cell Explorer fluo (AXT Pty Ltd, Warriewood, NSW) equipped with a NanoLive live cell incubator (AXT Pty Ltd).  $1 \times 10^4$  cells were seeded into a FluoroDish cell culture dish 35mm, 23mm well (World Precision Instruments, FD35) and maintained in phenol red free DMEM medium (Sigma-Aldrich, D1145) supplemented with 10% fetal bovine calf serum (Sigma-Aldrich, F9423), 2 mM glutamine (Sigma-Aldrich, G7513) and 1% penicillin-streptomycin for 48 hours. Immediately prior to imaging the medium was removed and replaced with 400  $\mu$ L of the same medium, followed by transfer to the live cell incubator chamber of the 3D Cell Explorer. Cells were incubated at 37°C, 5% CO<sub>2</sub> and 100% humidity for the duration of the time-lapse. Three dimensional holo-tomographic images were captured every 20 seconds for the duration of the time-lapse using the Nanolive STEVE software. For Supplemental Information File 9 the center plane of each 96 slice stack was exported after capture using the built in STEVE export



wizard as an .avi movie file. These files were exported at 5 frames per second (100x actual speed) to visualize cellular dynamics.

### **Subcutaneous mouse xenograft tumors**

Cells were expanded in culture for a maximum of 2 weeks before injection. Cells were trypsinized, pelleted, washed with PBS and stored on ice. Cell count was determined using a hemocytometer and trypan blue. Two million cells were resuspended in 100  $\mu$ L 50:50 Matrigel:PBS for sub-cutaneous injection into the left flank of female Nod-Skid gamma mice (8-12 weeks) via a 27-gauge needle according to ANU ethics protocol, ANU A2017/16. Mice were monitored and once the tumor was palpable (~2.5 -4 weeks), tumor growth was measured 3 times a week using calipers until tumors reach 1 cm<sup>3</sup> in volume. Once a group in the cohort reached the maximum size of tumor all tumors were harvested, weighed, photographed and fixed with formalin.

### **Statistical Analyses**

Unless specified otherwise, statistical analysis was performed using the SPSS package (IBM). For boxplot data depictions, whiskers represent quartiles 1 and 4 (with maximum and minimum values). Boxes represent quartiles 2 and 3, separated by the median, as generated by SPSS analyze data function. Datasets conforming with normal distribution were analyzed by ANOVA and post-hoc Bonferroni or Tukey HSD test (equal variance) or post-hoc Dunnett's T3 Test (unequal variance). Statistical differences between divergent treatments of different cell lines were calculated using two way ANOVA and post-hoc pairwise comparisons. For non-parametric data sets Kruskal-Wallis or Kolmogorov-Smirnov tests were performed, as indicated in relevant figure legends.

### **LIST OF ABBREVIATIONS**

adjP: Benjamini-Hochberg adjusted *p*-value

avFF: average mitochondrial form factor

CK2: Casein kinase 2

DM: hemagglutinin-tagged PGRMC1 S57A/S181 double mutant

EMT: epithelial-mesenchymal transition

ERR1: estrogen receptor related 1

FF: mitochondrial form factor

hPSCs: human pluripotent stem cells

IDA: information dependent acquisition

LDLR: low density lipoprotein receptor

MAT: mesenchymal-amoeboid transition

MP: MIA PaCa-2 pancreatic cancer

MS/MS: tandem mass spectrometry

MTT: 3-(4,5-dimethylthiazolyl-2)-2,5-diphenyltetrazolium bromide

NpFR2: Naphthalimide-flavin redox sensor 2

P4: progesterone

PAQR7: progestin and adipoQ receptor 7

PGRMC1: Progesterone Receptor Membrane Component 1

PGRMC2: Progesterone Receptor Membrane Component 2

ROCK: Rho kinase

ROCKI: Rho kinase inhibitor

RPPA: Reverse Phase Protein Array

S2R: Sigma-2 receptor

SH2: Src homology 2

SH3: Src homology 3

SWATH-MS: Sequential Window Acquisition of all Theoretical Mass Spectrometry

TM: hemagglutinin-tagged PGRMC1 S57A/Y180F/S181 triple mutant

TRiC: T-complex protein-1 ring complex

WT: hemagglutinin-tagged PGRMC1 wild type

$\Delta\psi_m$ : mitochondrial membrane potential

## **DECLARATIONS**

### **Ethics approval and consent to participate**

Mouse experiments were approved by The Australian National University Animal Experimentation Ethics Committee ethics protocol ANU A2017/16, and by Charles Sturt University Animal Care and Ethics Committee ethics protocol CSU A17046.

### **Consent for publication**

Not applicable.

### **Availability of data and materials**

The mass spectrometry proteomics data have been deposited to the ProteomeXchange Consortium via the PRIDE partner repository (<http://www.ebi.ac.uk/pride>) with the dataset identifiers PXD014716 (Figure 3) and PXD014789 (Figure S4). Further data are provided in 9 supporting information files available from the journal web page.

### **Competing interests**

M.A.C. is scientific advisor to and minor shareholder of Cognition Therapeutics, a company developing sigma-2 receptor ligands against Alzheimer's disease. This work was performed independently of and without input from the company. The authors declare that they have no other competing interests.

### **Funding**

This work has received no direct Australian competitive grant support since M.A.C.'s relocation to the country in 2008. The present results have been compiled largely due to the generosity of collaborating authors, and by the PhD stipends of B.M.T. and P.P.A. Research was primarily supported by Charles Sturt University internal funds to M.A.C and J.A.J, and by collaborating labs. Open access publication fees were jointly supported by CSU's Faculty of Science, School of Biomedical Sciences, and Research Office. B.M.T. was supported by a PhD scholarship from the Ministry of Higher Education and Research, through the University of Wasit, Iraq. A.K. acknowledges the University of

Sydney for a World Scholars Scholarship. E.M.G. acknowledges partial support of Australian Research Council award CE140100003. E.J.N. acknowledges the support of the Australian Research Council (DE120102687) and the Ramaciotti Foundation (ES2012/0051). T.L.R. is supported by a Cancer Institute New South Wales Future Research Leader Fellowship. M.P. is supported by a NHMRC RD Wright Biomedical Career Development Fellowship and the Cancer Institute NSW Career Development Fellowship.

### **Authors' contributions**

Conceptualization, M.A.C.; Methodology, M.A.C, P.P.A, A.V.O., M.P., E.J.N, S.J.K. and M.P.M; Software, D.P. (proteomics); Formal Analysis, P.P.A., D.P., M.J., E.P. M.A.C., and M.J.; Investigation, B.M.T., P.P.A., S.L.T., A.V.O., A.K., I.S., N.C., X.S., C.P.C., D.P., L.T., and J.C.C.; Resources, M.P.M., M.P., E.J.N., H.N., T.F., and J.C.Q.; Writing – Original Draft, M.A.C.; Writing – Review & Editing, M.P.M., M.A.C., P.P.A., E.M.G., C.P.C., B.M.T., M.P., E.M.G, and X.S.; Visualization, M.A.C.; Supervision, M.A.C, J.A.J., E.M.G., E.J.N., T.L.R, and M.P.M.; Project Administration, M.A.C.; Funding Acquisition, M.A.C., J.A.J., J.C.Q., E.M.G., M.P.M., T.L.R., and E.J.N.

### **Acknowledgements**

The publication hiatus of more than a decade on this project has been caused by the Australian competitive grants system failing to support a single funding application from M.A.C. after his relocation with the PGRMC1 project from Germany to a regional Australian university. We thank Padraig Strappe for the gift of lentiviral helper packaging plasmids and HEK293 cells. MIA PaCa-2 (MP) pancreatic cancer cells were obtained from Dr. Patsy Soon, Kolling Institute of Medical Research, Sydney. We thank Jean Yang for assistance in establishing the project.

## REFERENCES

1. Cahill MA: **Progesterone receptor membrane component 1: an integrative review.** *J Steroid Biochem Mol Biol* 2007, **105**(1-5):16-36.
2. Peluso JJ, Pappalardo A, Losel R, Wehling M: **Progesterone receptor component 1 expression in the immature rat ovary and its role in mediating progesterone's antiapoptotic action.** *Endocrinology* 2006, **147**(6):3133-3140.
3. Cahill MA, Jazayeri JA, Catalano SM, Toyokuni S, Kovacevic Z, Richardson DR: **The emerging role of progesterone receptor membrane component 1 (PGRMC1) in cancer biology.** *Biochimica et biophysica acta* 2016, **1866**(2):339-349.
4. Franchin C, Borgo C, Cesaro L, Zaramella S, Vilardell J, Salvi M, Arrigoni G, Pinna LA: **Re-evaluation of protein kinase CK2 pleiotropy: new insights provided by a phosphoproteomics analysis of CK2 knockout cells.** *Cellular and molecular life sciences : CMLS* 2018, **75**(11):2011-2026.
5. Cahill MA, Jazayeri JA, Kovacevic Z, Richardson DR: **PGRMC1 regulation by phosphorylation: potential new insights in controlling biological activity.** *Oncotarget* 2016, **7**(32):50822-50827.
6. Cahill MA: **The evolutionary appearance of signaling motifs in PGRMC1.** *Bioscience trends* 2017, **11**(2):179-192.
7. Hehenberger E, Eitel M, Fortunato SAV, Miller DJ, Keeling PJ, Cahill MA: **Early eukaryotic origins and metazoan elaboration of MAPR family proteins.** \*Accompanying Paper-Citation ##### 2019-acc, #####: bioRxiv preprint (not peer-reviewed): <https://doi.org/10.1101/737684>.
8. Peluso JJ, Griffin D, Liu X, Horne M: **Progesterone receptor membrane component-1 (PGRMC1) and PGRMC-2 interact to suppress entry into the cell cycle in spontaneously immortalized rat granulosa cells.** *Biology of reproduction* 2014, **91**(5):104.
9. Sueldo C, Liu X, Peluso JJ: **Progesterin and AdipoQ Receptor 7, Progesterone Membrane Receptor Component 1 (PGRMC1), and PGRMC2 and Their Role in Regulating Progesterone's Ability to Suppress Human Granulosa/Luteal Cells from Entering into the Cell Cycle.** *Biology of reproduction* 2015, **93**(3):63.
10. Thomas P, Pang Y, Dong J: **Enhancement of cell surface expression and receptor functions of membrane progesterin receptor alpha (mPRalpha) by progesterone receptor membrane component 1 (PGRMC1): evidence for a role of PGRMC1 as an adaptor protein for steroid receptors.** *Endocrinology* 2014, **155**(3):1107-1119.
11. Ahmed IS, Rohe HJ, Twist KE, Craven RJ: **Pgrmc1 (progesterone receptor membrane component 1) associates with epidermal growth factor receptor and regulates erlotinib sensitivity.** *The Journal of biological chemistry* 2010, **285**(32):24775-24782.
12. Zhang M, Robitaille M, Showalter AD, Huang X, Liu Y, Bhattacharjee A, Willard FS, Han J, Froese S, Wei L *et al*: **Progesterone receptor membrane component 1 is a functional part of the glucagon-like peptide-1 (GLP-1) receptor complex in pancreatic beta cells.** *Mol Cell Proteomics* 2014, **13**(11):3049-3062.
13. Hampton KK, Anderson K, Frazier H, Thibault O, Craven RJ: **Insulin Receptor Plasma Membrane Levels Increased by the Progesterone Receptor Membrane Component 1.** *Molecular pharmacology* 2018, **94**(1):665-673.

14. Cahill MA, Medlock AE: **Thoughts on interactions between PGRMC1 and diverse attested and potential hydrophobic ligands.** *J Steroid Biochem Mol Biol* 2017, **171**:11-33.
15. Riad A, Zeng C, Weng CC, Winters H, Xu K, Makvandi M, Metz T, Carlin S, Mach RH: **Sigma-2 Receptor/TMEM97 and PGRMC-1 Increase the Rate of Internalization of LDL by LDL Receptor through the Formation of a Ternary Complex.** *Sci Rep* 2018, **8**(1):16845.
16. Aguinaga D, Medrano M, Vega-Quiroga I, Gysling K, Canela EI, Navarro G, Franco R: **Cocaine Effects on Dopaminergic Transmission Depend on a Balance between Sigma-1 and Sigma-2 Receptor Expression.** *Frontiers in molecular neuroscience* 2018, **11**:17.
17. Alon A, Schmidt HR, Wood MD, Sahn JJ, Martin SF, Kruse AC: **Identification of the gene that codes for the sigma2 receptor.** *Proceedings of the National Academy of Sciences of the United States of America* 2017, **114**(27):7160-7165.
18. Pati ML, Groza D, Riganti C, Kopecka J, Niso M, Berardi F, Hager S, Heffeter P, Hirai M, Tsugawa H *et al*: **Sigma-2 receptor and progesterone receptor membrane component 1 (PGRMC1) are two different proteins: Proofs by fluorescent labeling and binding of sigma-2 receptor ligands to PGRMC1.** *Pharmacological research* 2017, **117**:67-74.
19. Piel RB, 3rd, Shiferaw MT, Vashisht AA, Marcero JR, Praissman JL, Phillips JD, Wohlschlegel JA, Medlock AE: **A Novel Role for Progesterone Receptor Membrane Component 1 (PGRMC1): A Partner and Regulator of Ferrochelatase.** *Biochemistry* 2016, **55**(37):5204-5217.
20. Luciano AM, Lodde V, Franciosi F, Ceciliani F, Peluso JJ: **Progesterone receptor membrane component 1 expression and putative function in bovine oocyte maturation, fertilization, and early embryonic development.** *Reproduction (Cambridge, England)* 2010, **140**(5):663-672.
21. Luciano AM, Peluso JJ: **PGRMC1 and the faithful progression through mitosis and meiosis.** *Cell cycle (Georgetown, Tex)* 2016, **15**(17):2239-2240.
22. Terzaghi L, Luciano AM, Dall'Acqua PC, Modena SC, Peluso JJ, Lodde V: **PGRMC1 localization and putative function in the nucleolus of bovine granulosa cells and oocytes.** *Reproduction (Cambridge, England)* 2018, **155**(3):273-282.
23. Terzaghi L, Tessaro I, Raucci F, Merico V, Mazzini G, Garagna S, Zuccotti M, Franciosi F, Lodde V: **PGRMC1 participates in late events of bovine granulosa cells mitosis and oocyte meiosis.** *Cell cycle (Georgetown, Tex)* 2016, **15**(15):2019-2032.
24. Albrecht C, Huck V, Wehling M, Wendler A: **In vitro inhibition of SKOV-3 cell migration as a distinctive feature of progesterone receptor membrane component type 2 versus type 1.** *Steroids* 2012, **77**(14):1543-1550.
25. Ye X, Zhang Y, He B, Meng Y, Li Y, Gao Y: **Quantitative proteomic analysis identifies new effectors of FOXM1 involved in breast cancer cell migration.** *International journal of clinical and experimental pathology* 2015, **8**(12):15836-15844.
26. Rohe HJ, Ahmed IS, Twist KE, Craven RJ: **PGRMC1 (progesterone receptor membrane component 1): a targetable protein with multiple functions in steroid signaling, P450 activation and drug binding.** *Pharmacol Ther* 2009, **121**(1):14-19.
27. Ahmed IS, Rohe HJ, Twist KE, Mattingly MN, Craven RJ: **Progesterone receptor membrane component 1 (Pgrmc1): a heme-1 domain protein that promotes tumorigenesis and is inhibited by a small molecule.** *J Pharmacol Exp Ther* 2010, **333**(2):564-573.

28. Losel RM, Besong D, Peluso JJ, Wehling M: **Progesterone receptor membrane component 1--many tasks for a versatile protein.** *Steroids* 2008, **73**(9-10):929-934.
29. Ruan X, Zhang Y, Mueck AO, Willibald M, Seeger H, Fehm T, Brucker S, Neubauer H: **Increased expression of progesterone receptor membrane component 1 is associated with aggressive phenotype and poor prognosis in ER-positive and negative breast cancer.** *Menopause (New York, NY)* 2017, **24**(2):203-209.
30. Willibald M, Wurster I, Meisner C, Vogel U, Seeger H, Mueck AO, Fehm T, Neubauer H: **High Level of Progesteron Receptor Membrane Component 1 (PGRMC 1) in Tissue of Breast Cancer Patients is Associated with Worse Response to Anthracycline-Based Neoadjuvant Therapy.** *Hormone and metabolic research = Hormon- und Stoffwechselforschung = Hormones et metabolisme* 2017, **49**(8):595-603.
31. Shih CC, Chou HC, Chen YJ, Kuo WH, Chan CH, Lin YC, Liao EC, Chang SJ, Chan HL: **Role of PGRMC1 in cell physiology of cervical cancer.** *Life sciences* 2019, **S0024-3205**(19):30461-30468.
32. Ruan X, Gu M, Cai G, Zhao Y, Wang L, Li X, Mueck AO: **Progestogens and PGRMC1-dependent breast cancer tumor growth: An in-vitro and xenograft study.** *Maturitas* 2019, **123**:1-8.
33. Gu M, Wang L, Yang C, Li X, Jia C, Croteau S, Ruan X, Hardy P: **Micro-RNA-181a suppresses progestin-promoted breast cancer cell growth.** *Maturitas* 2018, **114**:60-66.
34. Zhao Y, Ruan X, Wang H, Li X, Gu M, Wang L, Li Y, Seeger H, Mueck AO: **The presence of a membrane-bound progesterone receptor induces growth of breast cancer with norethisterone but not with progesterone: A xenograft model.** *Maturitas* 2017, **102**:26-33.
35. Zhang Y, Ruan X, Willibald M, Seeger H, Fehm T, Neubauer H, Mueck AO: **May progesterone receptor membrane component 1 (PGRMC1) predict the risk of breast cancer?** *Gynecological endocrinology : the official journal of the International Society of Gynecological Endocrinology* 2016, **32**(1):58-60.
36. Mueck AO, Ruan X, Seeger H, Fehm T, Neubauer H: **Genomic and non-genomic actions of progestogens in the breast.** *J Steroid Biochem Mol Biol* 2014, **142**:62-67.
37. Li X, Ruan X, Gu M, Mueck AO: **PGRMC1 can trigger estrogen-dependent proliferation of breast cancer cells: estradiol vs. equilin vs. ethinylestradiol.** *Climacteric : the journal of the International Menopause Society* 2019:1-6.
38. Neubauer H, Ruan X, Schneck H, Seeger H, Cahill MA, Liang Y, Mafuvadze B, Hyder SM, Fehm T, Mueck AO: **Overexpression of progesterone receptor membrane component 1: possible mechanism for increased breast cancer risk with norethisterone in hormone therapy.** *Menopause (New York, NY)* 2013, **20**(5):504-510.
39. Friel AM, Zhang L, Pru CA, Clark NC, McCallum ML, Blok LJ, Shioda T, Peluso JJ, Rueda BR, Pru JK: **Progesterone receptor membrane component 1 deficiency attenuates growth while promoting chemosensitivity of human endometrial xenograft tumors.** *Cancer letters* 2015, **356**(2 Pt B):434-442.
40. Clark NC, Friel AM, Pru CA, Zhang L, Shioda T, Rueda BR, Peluso JJ, Pru JK: **Progesterone receptor membrane component 1 promotes survival of human breast cancer cells and the growth of xenograft tumors.** *Cancer biology & therapy* 2016, **17**(3):262-271.
41. Zhu X, Han Y, Fang Z, Wu W, Ji M, Teng F, Zhu W, Yang X, Jia X, Zhang C: **Progesterone protects ovarian cancer cells from cisplatin-induced inhibitory**

- effects through progesterone receptor membrane component 1/2 as well as **AKT signaling**. *Oncology reports* 2013, **30**(5):2488-2494.
42. Lin ST, May EW, Chang JF, Hu RY, Wang LH, Chan HL: **PGRMC1 contributes to doxorubicin-induced chemoresistance in MES-SA uterine sarcoma**. *Cellular and molecular life sciences : CMLS* 2015, **72**(12):2395-2409.
  43. Kabe Y, Nakane T, Koike I, Yamamoto T, Sugiura Y, Harada E, Sugase K, Shimamura T, Ohmura M, Muraoka K *et al*: **Haem-dependent dimerization of PGRMC1/Sigma-2 receptor facilitates cancer proliferation and chemoresistance**. *Nat Commun* 2016, **7**:11030.
  44. Neubauer H, Clare SE, Wozny W, Schwall GP, Poznanovic S, Stegmann W, Vogel U, Sotlar K, Wallwiener D, Kurek R *et al*: **Breast cancer proteomics reveals correlation between estrogen receptor status and differential phosphorylation of PGRMC1**. *Breast Cancer Res* 2008, **10**(5):R85.
  45. Hand RA, Craven RJ: **Hpr6.6 protein mediates cell death from oxidative damage in MCF-7 human breast cancer cells**. *Journal of cellular biochemistry* 2003, **90**(3):534-547.
  46. Bashour NM, Wray S: **Progesterone directly and rapidly inhibits GnRH neuronal activity via progesterone receptor membrane component 1**. *Endocrinology* 2012, **153**(9):4457-4469.
  47. Su C, Cunningham RL, Rybalchenko N, Singh M: **Progesterone increases the release of brain-derived neurotrophic factor from glia via progesterone receptor membrane component 1 (Pgrmc1)-dependent ERK5 signaling**. *Endocrinology* 2012, **153**(9):4389-4400.
  48. Li X, Rhee DK, Malhotra R, Mayeur C, Hurst LA, Ager E, Shelton G, Kramer Y, McCulloh D, Keefe D *et al*: **Progesterone receptor membrane component-1 regulates hepcidin biosynthesis**. *The Journal of clinical investigation* 2016, **126**(1):389-401.
  49. Latosinska A, Mokou M, Makridakis M, Mullen W, Zoidakis J, Lygirou V, Frantzi M, Katafigiotis I, Stravodimos K, Hupe MC *et al*: **Proteomics analysis of bladder cancer invasion: Targeting EIF3D for therapeutic intervention**. *Oncotarget* 2017, **8**(41):69435-69455.
  50. Wendler A, Wehling M: **PGRMC2, a yet uncharacterized protein with potential as tumor suppressor, migration inhibitor, and regulator of cytochrome P450 enzyme activity**. *Steroids* 2013, **78**(6):555-558.
  51. Kim JY, Kim SY, Choi HS, Kim MK, Lee HM, Jang YJ, Ryu CJ: **Progesterone Receptor Membrane Component 1 suppresses the p53 and Wnt/beta-catenin pathways to promote human pluripotent stem cell self-renewal**. *Sci Rep* 2018, **8**(1):3048.
  52. Peluso JJ: **Progesterone receptor membrane component 1 and its role in ovarian follicle growth**. *Frontiers in neuroscience* 2013, **7**:99.
  53. Peluso JJ, Lodde V, Liu X: **Progesterone regulation of progesterone receptor membrane component 1 (PGRMC1) sumoylation and transcriptional activity in spontaneously immortalized granulosa cells**. *Endocrinology* 2012, **153**(8):3929-3939.
  54. Peluso JJ, DeCerbo J, Lodde V: **Evidence for a genomic mechanism of action for progesterone receptor membrane component-1**. *Steroids* 2012, **77**(10):1007-1012.
  55. Sabbir MG: **Progesterone induced Warburg effect in HEK293 cells is associated with post-translational modifications and proteasomal degradation of progesterone receptor membrane component 1**. *J Steroid Biochem Mol Biol* 2019, **191**:105376.



56. Riester M, Xu Q, Moreira A, Zheng J, Michor F, Downey RJ: **The Warburg effect: persistence of stem-cell metabolism in cancers as a failure of differentiation.** *Annals of oncology : official journal of the European Society for Medical Oncology* 2018, **29**(1):264-270.
57. Gras F, Brunmair B, Quarre L, Szocs Z, Waldhausl W, Fornsinn C: **Progesterone impairs cell respiration and suppresses a compensatory increase in glucose transport in isolated rat skeletal muscle: a non-genomic mechanism contributing to metabolic adaptation to late pregnancy?** *Diabetologia* 2007, **50**(12):2544-2552.
58. Gosnell ME, Anwer AG, Mahbub SB, Menon Perinchery S, Inglis DW, Adhikary PP, Jazayeri JA, Cahill MA, Saad S, Pollock CA *et al*: **Quantitative non-invasive cell characterisation and discrimination based on multispectral autofluorescence features.** *Sci Rep* 2016, **6**:23453.
59. Yunis AA, Arimura GK, Russin DJ: **Human pancreatic carcinoma (MIA PaCa-2) in continuous culture: sensitivity to asparaginase.** *International journal of cancer Journal international du cancer* 1977, **19**(1):128-135.
60. Han EK, McGonigal T, Butler C, Giranda VL, Luo Y: **Characterization of Akt overexpression in MiaPaCa-2 cells: prohibitin is an Akt substrate both in vitro and in cells.** *Anticancer Res* 2008, **28**(2A):957-963.
61. Duong HQ, Hong YB, Kim JS, Lee HS, Yi YW, Kim YJ, Wang A, Zhao W, Cho CH, Seong YS *et al*: **Inhibition of checkpoint kinase 2 (CHK2) enhances sensitivity of pancreatic adenocarcinoma cells to gemcitabine.** *J Cell Mol Med* 2013, **17**(10):1261-1270.
62. Iwagami Y, Eguchi H, Nagano H, Akita H, Hama N, Wada H, Kawamoto K, Kobayashi S, Tomokuni A, Tomimaru Y *et al*: **miR-320c regulates gemcitabine-resistance in pancreatic cancer via SMARCC1.** *Br J Cancer* 2013, **109**(2):502-511.
63. Gradiz R, Silva HC, Carvalho L, Botelho MF, Mota-Pinto A: **MIA PaCa-2 and PANC-1 - pancreas ductal adenocarcinoma cell lines with neuroendocrine differentiation and somatostatin receptors.** *Sci Rep* 2016, **6**:21648.
64. Fujita M, Otsuka Y, Yamada S, Iwakawa M, Imai T: **X-ray irradiation and Rho-kinase inhibitor additively induce invasiveness of the cells of the pancreatic cancer line, MIAPaCa-2, which exhibits mesenchymal and amoeboid motility.** *Cancer science* 2011, **102**(4):792-798.
65. Thejer BM, Adhikary PP, Teakel SL, Fang J, Weston PA, Gurusinghe S, Anwer AG, Gosnell M, Jazayeri JA, Ludescher M *et al*: **PGRMC1 phosphorylation status and cell plasticity 2: genomic integrity and CpG methylation.** *\*Accompanying Paper-Citation ##### 2019-II, #####: bioRxiv preprint (not peer-reviewed): <https://doi.org/10.1101/737783>.*
66. Suchanek M, Radzikowska A, Thiele C: **Photo-leucine and photo-methionine allow identification of protein-protein interactions in living cells.** *Nature methods* 2005, **2**(4):261-267.
67. Matsuoka T, Yashiro M: **Rho/ROCK signaling in motility and metastasis of gastric cancer.** *World J Gastroenterol* 2014, **20**(38):13756-13766.
68. Cha D, O'Brien P, O'Toole EA, Woodley DT, Hudson LG: **Enhanced modulation of keratinocyte motility by transforming growth factor-alpha (TGF-alpha) relative to epidermal growth factor (EGF).** *The Journal of investigative dermatology* 1996, **106**(4):590-597.
69. Gillet LC, Navarro P, Tate S, Rost H, Selevsek N, Reiter L, Bonner R, Aebersold R: **Targeted data extraction of the MS/MS spectra generated by data-independent acquisition: a new concept for consistent and accurate proteome analysis.** *Mol Cell Proteomics* 2012, **11**(6):O111 016717.

70. Wang J, Duncan D, Shi Z, Zhang B: **WEB-based GENE SeT AnaLysis Toolkit (WebGestalt): update 2013**. *Nucleic Acids Res* 2013, **41**(Web Server issue):W77-83.
71. Lee SR, Kwon SW, Kaya P, Lee YH, Lee JG, Kim G, Lee GS, Baek IJ, Hong EJ: **Loss of progesterone receptor membrane component 1 promotes hepatic steatosis via the induced de novo lipogenesis**. *Sci Rep* 2018, **8**(1):15711.
72. Parker CG, Galmozzi A, Wang Y, Correia BE, Sasaki K, Joslyn CM, Kim AS, Cavallaro CL, Lawrence RM, Johnson SR *et al*: **Ligand and Target Discovery by Fragment-Based Screening in Human Cells**. *Cell* 2017, **168**(3):527-541 e529.
73. Bordeleau ME, Aucagne R, Chagraoui J, Girard S, Mayotte N, Bonneil E, Thibault P, Pabst C, Bergeron A, Barabe F *et al*: **UBAP2L is a novel BMI1-interacting protein essential for hematopoietic stem cell activity**. *Blood* 2014, **124**(15):2362-2369.
74. Harada H, Becknell B, Wilm M, Mann M, Huang LJ, Taylor SS, Scott JD, Korsmeyer SJ: **Phosphorylation and inactivation of BAD by mitochondria-anchored protein kinase A**. *Mol Cell* 1999, **3**(4):413-422.
75. Hayakawa J, Ohmichi M, Kurachi H, Kanda Y, Hisamoto K, Nishio Y, Adachi K, Tasaka K, Kanzaki T, Murata Y: **Inhibition of BAD phosphorylation either at serine 112 via extracellular signal-regulated protein kinase cascade or at serine 136 via Akt cascade sensitizes human ovarian cancer cells to cisplatin**. *Cancer Res* 2000, **60**(21):5988-5994.
76. Cross DA, Alessi DR, Cohen P, Andjelkovich M, Hemmings BA: **Inhibition of glycogen synthase kinase-3 by insulin mediated by protein kinase B**. *Nature* 1995, **378**(6559):785-789.
77. Antonietti P, Linder B, Hehlhans S, Mildenerberger IC, Burger MC, Fulda S, Steinbach JP, Gessler F, Rodel F, Mittelbronn M *et al*: **Interference with the HSF1/HSP70/BAG3 Pathway Primes Glioma Cells to Matrix Detachment and BH3 Mimetic-Induced Apoptosis**. *Molecular cancer therapeutics* 2017, **16**(1):156-168.
78. Joshi B, Strugnelli SS, Goetz JG, Kojic LD, Cox ME, Griffith OL, Chan SK, Jones SJ, Leung SP, Masoudi H *et al*: **Phosphorylated caveolin-1 regulates Rho/ROCK-dependent focal adhesion dynamics and tumor cell migration and invasion**. *Cancer Res* 2008, **68**(20):8210-8220.
79. Le Clainche C, Dwivedi SP, Didry D, Carlier MF: **Vinculin is a dually regulated actin filament barbed end-capping and side-binding protein**. *The Journal of biological chemistry* 2010, **285**(30):23420-23432.
80. Pal I, Rajesh Y, Banik P, Dey G, Dey KK, Bharti R, Naskar D, Chakraborty S, Ghosh SK, Das SK *et al*: **Prevention of epithelial to mesenchymal transition in colorectal carcinoma by regulation of the E-cadherin-beta-catenin-vinculin axis**. *Cancer letters* 2019, **452**:254-263.
81. Kaur A, Brigden KW, Cashman TF, Fraser ST, New EJ: **Mitochondrially targeted redox probe reveals the variations in oxidative capacity of the haematopoietic cells**. *Organic & biomolecular chemistry* 2015, **13**(24):6686-6689.
82. Perry SW, Norman JP, Barbieri J, Brown EB, Gelbard HA: **Mitochondrial membrane potential probes and the proton gradient: a practical usage guide**. *BioTechniques* 2011, **50**(2):98-115.
83. Gosnell ME, Anwer AG, Cassano JC, Sue CM, Goldys EM: **Functional hyperspectral imaging captures subtle details of cell metabolism in olfactory neurosphere cells, disease-specific models of neurodegenerative disorders**. *Biochimica et biophysica acta* 2016, **1863**(1):56-63.

84. Koopman WJ, Visch HJ, Smeitink JA, Willems PH: **Simultaneous quantitative measurement and automated analysis of mitochondrial morphology, mass, potential, and motility in living human skin fibroblasts.** *Cytometry Part A : the journal of the International Society for Analytical Cytology* 2006, **69**(1):1-12.
85. Ali A, Abouleila Y, Amer S, Furushima R, Emara S, Equis S, Cotte Y, Masujima T: **Quantitative Live Single-cell Mass Spectrometry with Spatial Evaluation by Three-Dimensional Holographic and Tomographic Laser Microscopy.** *Analytical sciences : the international journal of the Japan Society for Analytical Chemistry* 2016, **32**(2):125-127.
86. Anesti V, Scorrano L: **The relationship between mitochondrial shape and function and the cytoskeleton.** *Biochimica et biophysica acta* 2006, **1757**(5-6):692-699.
87. Sahai E, Marshall CJ: **Differing modes of tumour cell invasion have distinct requirements for Rho/ROCK signalling and extracellular proteolysis.** *Nat Cell Biol* 2003, **5**(8):711-719.
88. Seol HJ, Chang JH, Yamamoto J, Romagnuolo R, Suh Y, Weeks A, Agnihotri S, Smith CA, Rutka JT: **Overexpression of CD99 Increases the Migration and Invasiveness of Human Malignant Glioma Cells.** *Genes & cancer* 2012, **3**(9-10):535-549.
89. Taddei ML, Giannoni E, Morandi A, Ippolito L, Ramazzotti M, Callari M, Gandellini P, Chiarugi P: **Mesenchymal to amoeboid transition is associated with stem-like features of melanoma cells.** *Cell communication and signaling : CCS* 2014, **12**:24.
90. Friedl P: **Prespecification and plasticity: shifting mechanisms of cell migration.** *Current opinion in cell biology* 2004, **16**(1):14-23.
91. Parri M, Taddei ML, Bianchini F, Calorini L, Chiarugi P: **EphA2 reexpression prompts invasion of melanoma cells shifting from mesenchymal to amoeboid-like motility style.** *Cancer Res* 2009, **69**(5):2072-2081.
92. Friedl P, Wolf K: **Plasticity of cell migration: a multiscale tuning model.** *The Journal of cell biology* 2010, **188**(1):11-19.
93. Wai T, Langer T: **Mitochondrial Dynamics and Metabolic Regulation.** *Trends in endocrinology and metabolism: TEM* 2016, **27**(2):105-117.
94. Kim HJ, Choi WJ, Lee CH: **Phosphorylation and Reorganization of Keratin Networks: Implications for Carcinogenesis and Epithelial Mesenchymal Transition.** *Biomolecules & therapeutics* 2015, **23**(4):301-312.
95. Roh SH, Kasembeli M, Bakthavatsalam D, Chiu W, Twardy DJ: **Contribution of the Type II Chaperonin, TRiC/CCT, to Oncogenesis.** *International journal of molecular sciences* 2015, **16**(11):26706-26720.
96. Boudiaf-Benmammar C, Cresteil T, Melki R: **The cytosolic chaperonin CCT/TRiC and cancer cell proliferation.** *PloS one* 2013, **8**(4):e60895.
97. Guest ST, Kratche ZR, Bollig-Fischer A, Haddad R, Ethier SP: **Two members of the TRiC chaperonin complex, CCT2 and TCP1 are essential for survival of breast cancer cells and are linked to driving oncogenes.** *Experimental cell research* 2015, **332**(2):223-235.
98. Zhang Y, Wang Y, Wei Y, Wu J, Zhang P, Shen S, Saiyin H, Wumaier R, Yang X, Wang C *et al*: **Molecular chaperone CCT3 supports proper mitotic progression and cell proliferation in hepatocellular carcinoma cells.** *Cancer letters* 2016, **372**(1):101-109.
99. Wu XJ, Thomas P, Zhu Y: **Pgrmc1 Knockout Impairs Oocyte Maturation in Zebrafish.** *Frontiers in endocrinology* 2018, **9**:560.
100. He Y, Zhang P, Zhang D, Xia Z, Wang X, Deng S, Li H, Zhu H, Xu N, Liang S: **Combined assessment of low PGRMC1/positive ATP1A1 levels has enhanced**

- prognostic value for renal cell carcinoma.** *Oncology reports* 2018, **40**(3):1467-1476.
101. Zhu X, Ji M, Han Y, Guo Y, Zhu W, Gao F, Yang X, Zhang C: **PGRMC1-dependent autophagy by hyperoside induces apoptosis and sensitizes ovarian cancer cells to cisplatin treatment.** *International journal of oncology* 2017, **50**(3):835-846.
  102. Liu L, Wang J, Zhao L, Nilsen J, McClure K, Wong K, Brinton RD: **Progesterone increases rat neural progenitor cell cycle gene expression and proliferation via extracellularly regulated kinase and progesterone receptor membrane components 1 and 2.** *Endocrinology* 2009, **150**(7):3186-3196.
  103. Yanai I: **Development and Evolution through the Lens of Global Gene Regulation.** *Trends in genetics : TIG* 2018, **34**(1):11-20.
  104. Quin J, Chan KT, Devlin JR, Cameron DP, Diesch J, Cullinane C, Ahern J, Khot A, Hein N, George AJ *et al*: **Inhibition of RNA polymerase I transcription initiation by CX-5461 activates non-canonical ATM/ATR signaling.** *Oncotarget* 2016, **7**(31):49800-49818.
  105. Gurusinghe S, Young P, Michelsen J, Strappe P: **Suppression of dedifferentiation and hypertrophy in canine chondrocytes through lentiviral vector expression of Sox9 and induced pluripotency stem cell factors.** *Biotechnology letters* 2015, **37**(7):1495-1504.
  106. Perez-Riverol Y, Csordas A, Bai J, Bernal-Llinares M, Hewapathirana S, Kundu DJ, Inuganti A, Griss J, Mayer G, Eisenacher M *et al*: **The PRIDE database and related tools and resources in 2019: improving support for quantification data.** *Nucleic Acids Res* 2019, **47**(D1):D442-D450.
  107. Pawlak M, Schick E, Bopp MA, Schneider MJ, Oroszlan P, Ehrat M: **Zeptosens' protein microarrays: a novel high performance microarray platform for low abundance protein analysis.** *Proteomics* 2002, **2**(4):383-393.
  108. Pirnia F, Pawlak M, Thallinger GG, Gierke B, Templin MF, Kappeler A, Betticher DC, Gloor B, Borner MM: **Novel functional profiling approach combining reverse phase protein microarrays and human 3-D ex vivo tissue cultures: expression of apoptosis-related proteins in human colon cancer.** *Proteomics* 2009, **9**(13):3535-3548.
  109. Bader S, Zajac M, Friess T, Ruge E, Rieder N, Gierke B, Heubach Y, Thomas M, Pawlak M: **Evaluation of Protein Profiles From Treated Xenograft Tumor Models Identifies an Antibody Panel for Formalin-fixed and Paraffin-embedded (FFPE) Tissue Analysis by Reverse Phase Protein Arrays (RPPA).** *Mol Cell Proteomics* 2015, **14**(10):2775-2785.
  110. Kaistha BP, Lorenz H, Schmidt H, Sipos B, Pawlak M, Gierke B, Kreider R, Lankat-Buttgereit B, Sauer M, Fiedler L *et al*: **PLAC8 Localizes to the Inner Plasma Membrane of Pancreatic Cancer Cells and Regulates Cell Growth and Disease Progression through Critical Cell-Cycle Regulatory Pathways.** *Cancer Res* 2016, **76**(1):96-107.
  111. Strauss MP, Liew AT, Turnbull L, Whitchurch CB, Monahan LG, Harry EJ: **3D-SIM super resolution microscopy reveals a bead-like arrangement for FtsZ and the division machinery: implications for triggering cytokinesis.** *PLoS biology* 2012, **10**(9):e1001389.
  112. Schindelin J, Arganda-Carreras I, Frise E, Kaynig V, Longair M, Pietzsch T, Preibisch S, Rueden C, Saalfeld S, Schmid B *et al*: **Fiji: an open-source platform for biological-image analysis.** *Nature methods* 2012, **9**(7):676-682.



## FIGURES & LEGENDS

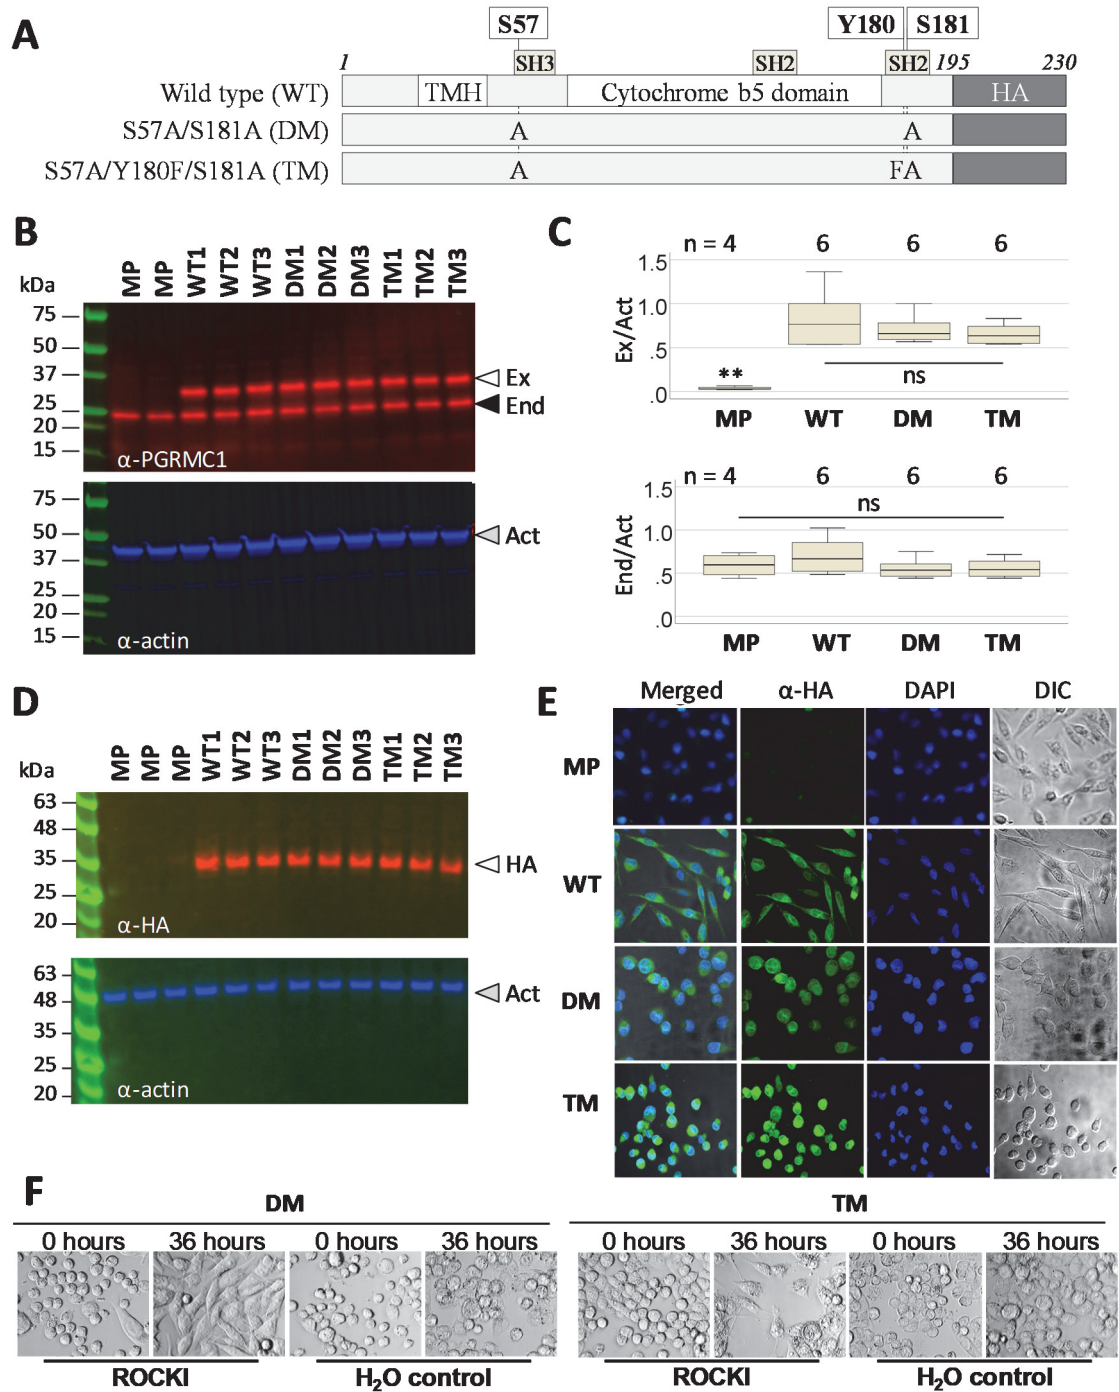

**Figure 1. MIA PaCa-2 pancreatic cancer cells morphology is affected by PGRMC1 phosphorylation status.**

(A) PGRMC1-HA proteins constructed for this figure. TMH: Trans-membrane helix. HA: the C-terminal 3x hemagglutinin tag.

(B) Detection of exogenous PGRMC1 expression levels by western blot (upper panel). Equal loading is controlled by quantifying beta actin (lower panel). The results show

three totally independent stably transfected cell lines per plasmid from (A). Open arrow: Exogenous PGRMC1-HA (Ex.). Shaded arrow: endogenous PGRMC1 (End.). Filled arrow: beta actin. The molecular weight ladder is Bio-Rad 1610377 Dual Xtra Standards.

(C) Box plots quantification of replicate gels of (B) with signals normalized to beta actin from the same respective lanes. n=4 lanes for MP and n=6 for WT, DM and TM (replicates of respective lines 1-3 per condition). There were no significant differences (ns) except for the exogenous band in MP (ANOVA, post-hoc Dunnet's T3).

(D) Western blot quantification of HA-tagged exogenous PGRMC1, following B but detecting PGRMC1 with anti-HA antibody. The molecular weight ladder is Abcam ab116028 Prestained Protein Ladder.

(E) PGRMC1 mutant protein expression alters MIA PaCa-2 cell morphology. PGRMC1-HA-expressing stable cells (respective lines 1 from B) or MP cells were stained with a FITC-tagged anti-HA antibody (Anti-HA) and imaged by confocal microscopy. DNA was stained with DAPI. Cells were also imaged in differential interference contrast (DIC) microscopy mode. The respective left panels show merged images of all 3 channels.

(F) The rounded phenotype of double and triple mutant (E) was reversed to elongated phenotype after 125 $\mu$ M ROCKI addition, but not by addition of DMSO vehicle control.

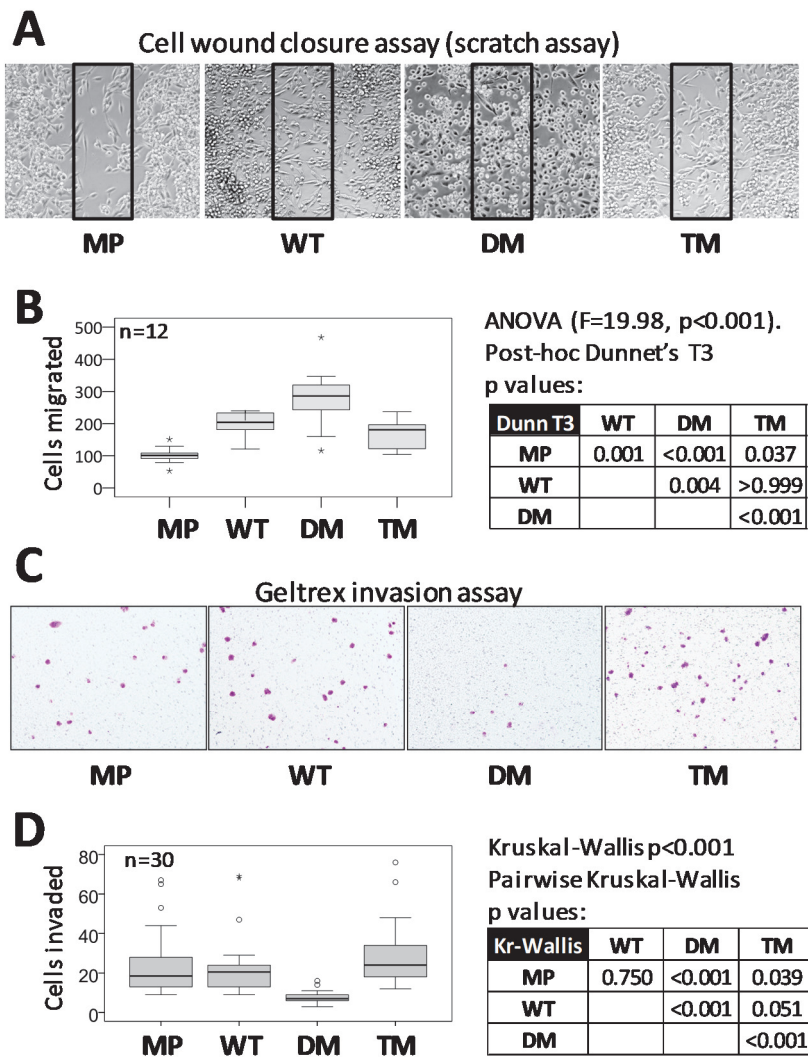

**Figure 2. PGRMC1 phosphorylation status affects motility and invasion.**

(A) DM cells exhibit enhanced motility in scratch assay. Representative results for scratch assays after 36 hr of cell migration. Cells in the boxed area of the scratched void area for each image were counted.

(B) Scratch assay cell migration results. Box plots of cell migration into the scratch void box areas depicted in (A) for multiple replicates.  $n=12$  (MP), or 4 replicates each of sublines 1-3 for WT and TM ( $n=3 \times 4=12$ ). The table shows the results of 1 way ANOVA with post hoc Dunnett's T3  $p$ -values. Video files of cell migration are available in Supplemental Information File 1.

(C) DM cells exhibit reduced invasion in Geltrex invasion assay. Representative images of crystal-violet stained cells in the lower surface of the transwell insert.

(D) Boxplots of invasion assay results from (C) for replicates, as produced by SPSS software.  $n=30$  (MP), or 10 replicates each of sublines 1-3 for WT and TM ( $n=3 \times 10=30$ ). The table shows the Kruskal-Wallis  $p$ -values for pairwise comparisons.



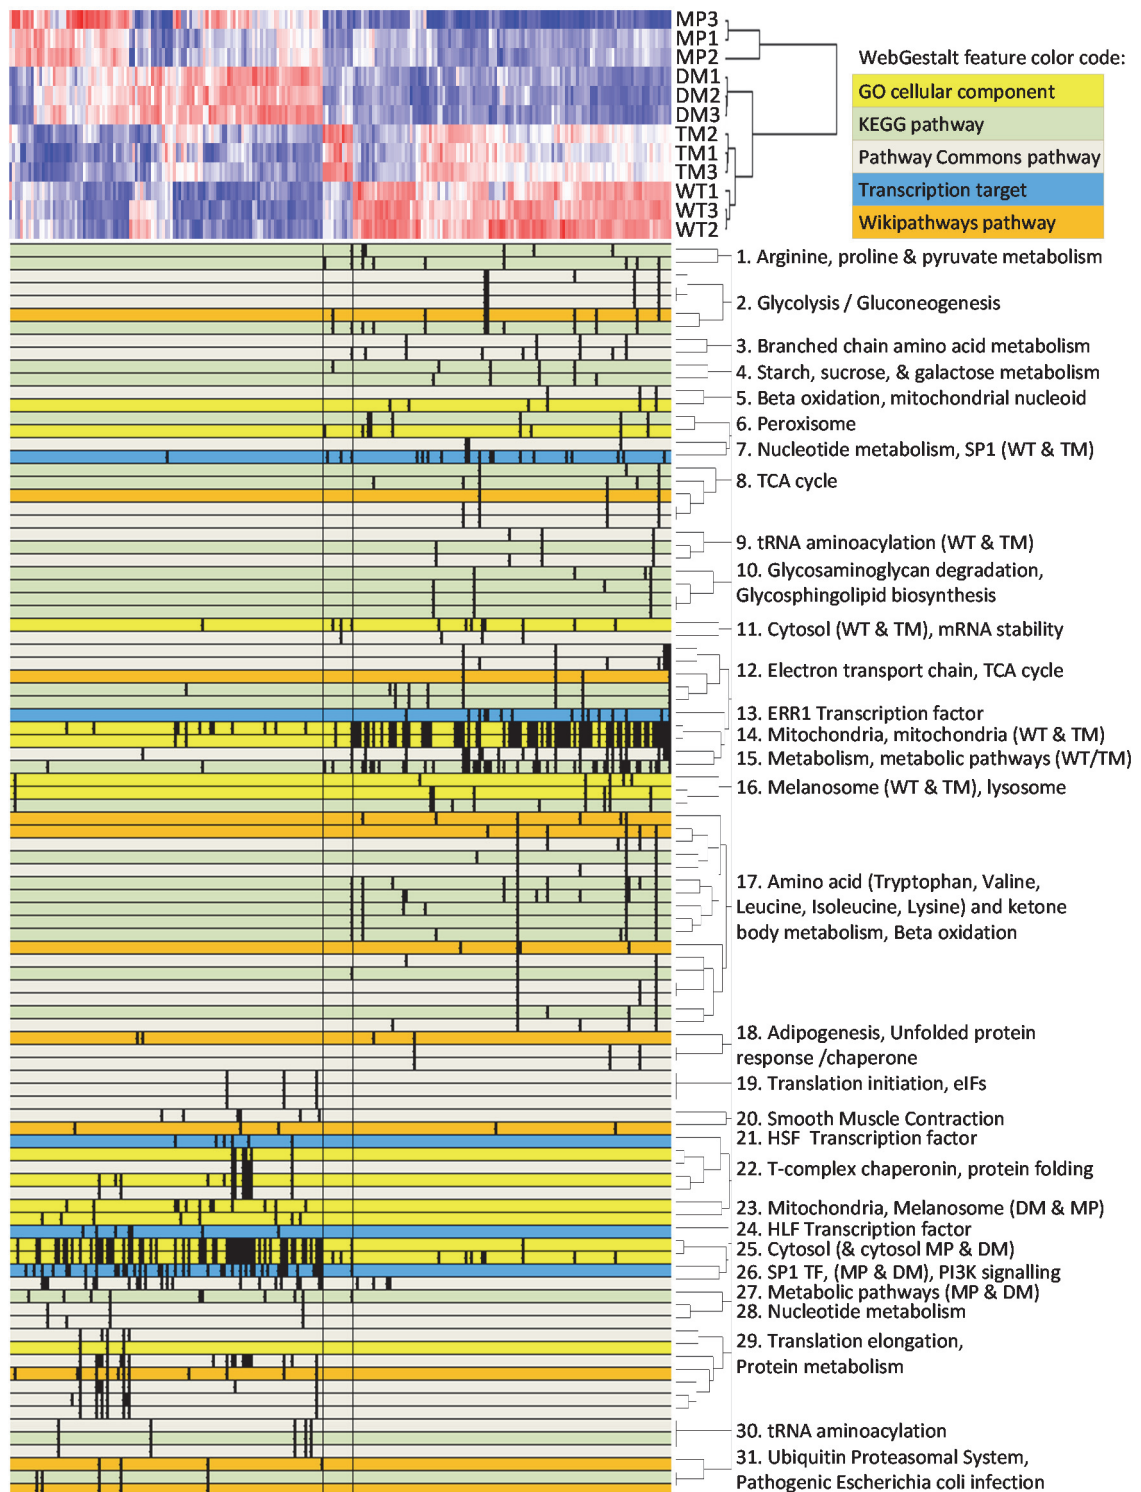

**Figure 3. Pathways analysis of SWATH-MS proteomics results.**

Pathways significantly enriched at the  $\text{adj}P > 0.001$  level between all 6 comparisons of “red” and “blue” differential proteins (red = higher abundance, blue = lower abundance, white = equal abundance). Top left: the proteomic heat map of 243 significantly differential proteins. A color code for WebGestalt pathways is given at top right. Bottom: WebGestalt pathways mapping. This image is derived from Supplemental Information File 6, which contains all protein and WebGestalt pathway identities.

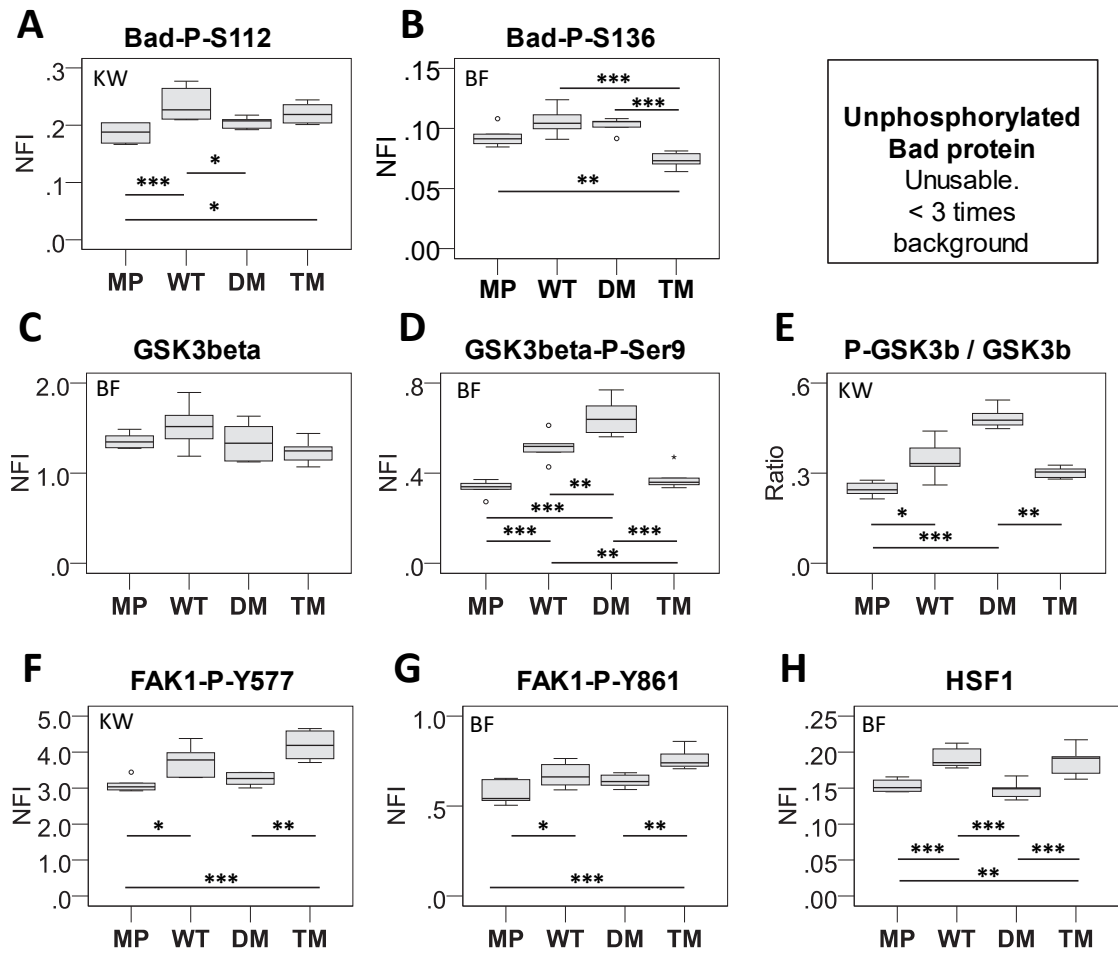

**Figure 4. RPPA measurements of protein and phosphorylated protein levels.**

(A-D, F-H) Average reverse phase protein array (RPPA) normalized fluorescent intensity (NFI) from the indicated antibodies (described in supplemental methods) is plotted from 6 replicate measurements. NFI is normalized to protein content. Statistical calculations for normally distributed data were made using one way ANOVA, and post-hoc Bonferroni (BF) for equal variances (all variances were equal). For non-parametric data, Kruskal-Wallis (KW) pairwise comparisons were calculated for 24 unrelated samples. \*  $p < 0.05$ ; \*\*  $p < 0.01$ , \*\*\*  $p < 0.001$ . Non-phosphorylated Bad levels could not be accurately determined because signal values were less than three times background. (E) The ratio of average NFI of D relative to C. Labels follow the above.

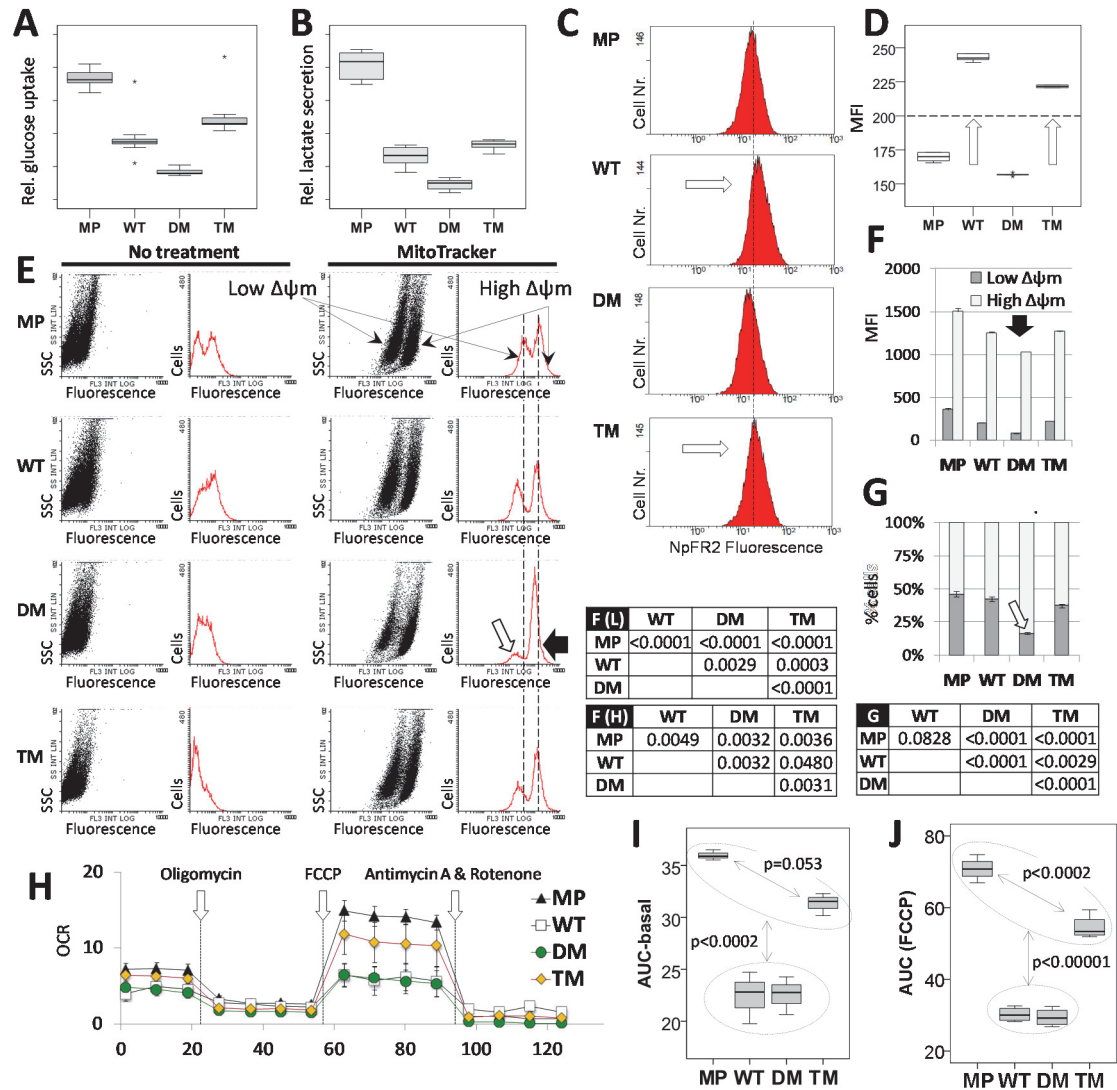

**Figure 5. PGRMC1 phosphorylation status affects glucose uptake, lactate secretion, and mitochondrial function.**

(A) Glucose uptake by cell lines using the Cayman “Glycolysis” kit. The boxplots represent four technical replicates each for each of independent stably transfected sub-lines 1-3 of each condition WT, DM and TM (lines from Figure 1). i.e.  $n=4 \times 3 = 12$  per condition. For MP cells, 12 replicates of the MP cell line were performed. A Shapiro-Wilk test showed the data were not normally distributed. There was significant difference between the means (Kruskal-Wallis Test  $p < 0.0001$ ). Pairwise Two-Sample Kolmogorov-Smirnov Tests revealed that all means were significantly different from one another (each  $p < 0.0002$ ).

(B) Lactate secretion by cell lines. Details follow (A), except duplicates of each stable cell line were measured ( $n=3 \times 2 = 6$  per condition) using the Cayman “Glycolysis Cell-Based Assay” kit, which measures lactate secretion. One way ANOVA showed that the means were significantly different between cell types ( $F=167.65$ ,  $p < 0.000001$ ). Levene’s test revealed unequal variances ( $F=1.25$ ,  $p=0.017$ ). Inter cell-type comparison post-hoc Dunnett’s T3 tests revealed that the means of all pairwise comparisons were significantly different from one another at the  $p < 0.003$  level, except the WT-TM comparison which was not significant ( $p=0.211$ ).

(C) Representative flow cytometry results of cells labeled with NpFR2. The percentage of the cell population to the right of the dashed reference line (interval labeled “B”, marked by the dotted line) is quantified for each measurement. White arrows indicate more oxidized NpFR2 fluorescence in WT and TM cells.

(D) Boxplots of the percentage of cells exhibiting >10 fluorescent intensity units to the right of the reference line in (C).  $n=6$  for each cell type, being 6 replicates of MP cells, or duplicate measurements of each of 3 independent lines 1-3 ( $n=3 \times 2=6$ ) for WT, DM and TM cells. White arrows indicate the same differences as in (C). There was significant difference between the means (Kruskal-Wallis Test  $p<0.0001$ ). Independent sample median tests revealed that all medians were significantly different from one another ( $p<0.001$ ).

(E) Representative flow cytometry results of cells labeled with MitoTracker. The respective panels depict fluorescence intensity (x axis) plotted against either side scatter (left/black plots) or cell number (right/red plots), with or without the addition of MitoTracker as indicated. MitoTracker affinity for mitochondria is increased with higher mitochondrial membrane potential ( $\Delta\psi_m$ ), such that respective left MitoTracker-treated populations/peaks represent low  $\Delta\psi_m$  populations, and respective right MitoTracker-treated populations/peaks represent high  $\psi_m$  populations. Vertical dotted lines for Mitotracker-treated cells depict the MFI for MP cell low and high  $\Delta\psi_m$  populations. The black arrow for DM cells with Mitotracker highlights reduced MFI of both the low and high  $\Delta\psi_m$  DM cell populations. The white arrow highlights the reduced proportion of DM cells in the low  $\Delta\psi_m$  peak. The same arrows are depicted for replicates in (F) and (G) respectively.

(F) Median Fluorescent Intensity (MFI) for each of the cell populations observed from (E).  $n=6$  measurements per cell type, as per (D). Error bars depict standard deviation. The low and high  $\Delta\psi_m$  populations correspond to the respective populations from (E). For low  $\Delta\psi_m$  cells, Shapiro-Wilk’s test showed normal distributions and Levene’s test revealed non-homogenous variances ( $p=0.0257$ ). ANOVA revealed that the means were significantly different between cell types ( $F=292.56$ ,  $p<0.000001$ ). Post hoc Dunnet’s T3 test revealed that all cell types were significantly different at the  $p<0.003$  level. For high  $\Delta\psi_m$  cells, Shapiro-Wilk’s test showed non-normal distributions. There were significant differences between the mean MFI of cell types. For WT vs. TM  $p<0.05$ . For all other comparisons  $p<0.004$  (Kruskal-Wallis). Tables show pairwise comparison  $p$ -values for low  $\Delta\psi_m$  (F(L)) and high  $\Delta\psi_m$  (F(H)) cells.

(G) The percentage of cells in each of the low and high  $\Delta\psi_m$  populations from (E) and (F), from the same data. Standard deviation error bars for the respective high  $\Delta\psi_m$  (upper error bar) and low  $\Delta\psi_m$  (lower error bar) cell populations are given for each cell type. Color-coding and all other terminology follows (E). For low  $\Delta\psi_m$  cells, Shapiro-Wilk’s test showed normal distributions, and Levene’s test revealed non-homogenous variance ( $p=0.04$ ). The table shows  $p$ -values for ANOVA/post hoc Dunnet’s T3 test pairwise comparisons.

(H) The maximal respiratory capacity of mitochondria is affected by PGRMC1 phosphorylation status. Mitochondrial oxygen consumption of respective independent clonal stable lines C1 of each PGRMC1-HA mutant condition WT, DM and TM were measured using a Seahorse Extracellular Flux analyzer XF24 (Seahorse Biosciences). Numbered arrows in H indicate the time of addition of ATP synthase inhibitor oligomycin (1),  $\Delta\psi_m$  uncoupler FCCP (2) and electron transport chain inhibitors

rotenone & antimycin A (3). OCR: oxygen consumption rate (pmol/min normalized per  $\mu\text{g}$  protein),  $n=5$ ;  $\pm$  s.d.

(I, J) Area under curve (AUC) plots for basal and FCCP curves from (H) showing one way ANOVA/post-hoc Bonferroni  $p$ -values between samples in the respective indicated regions.

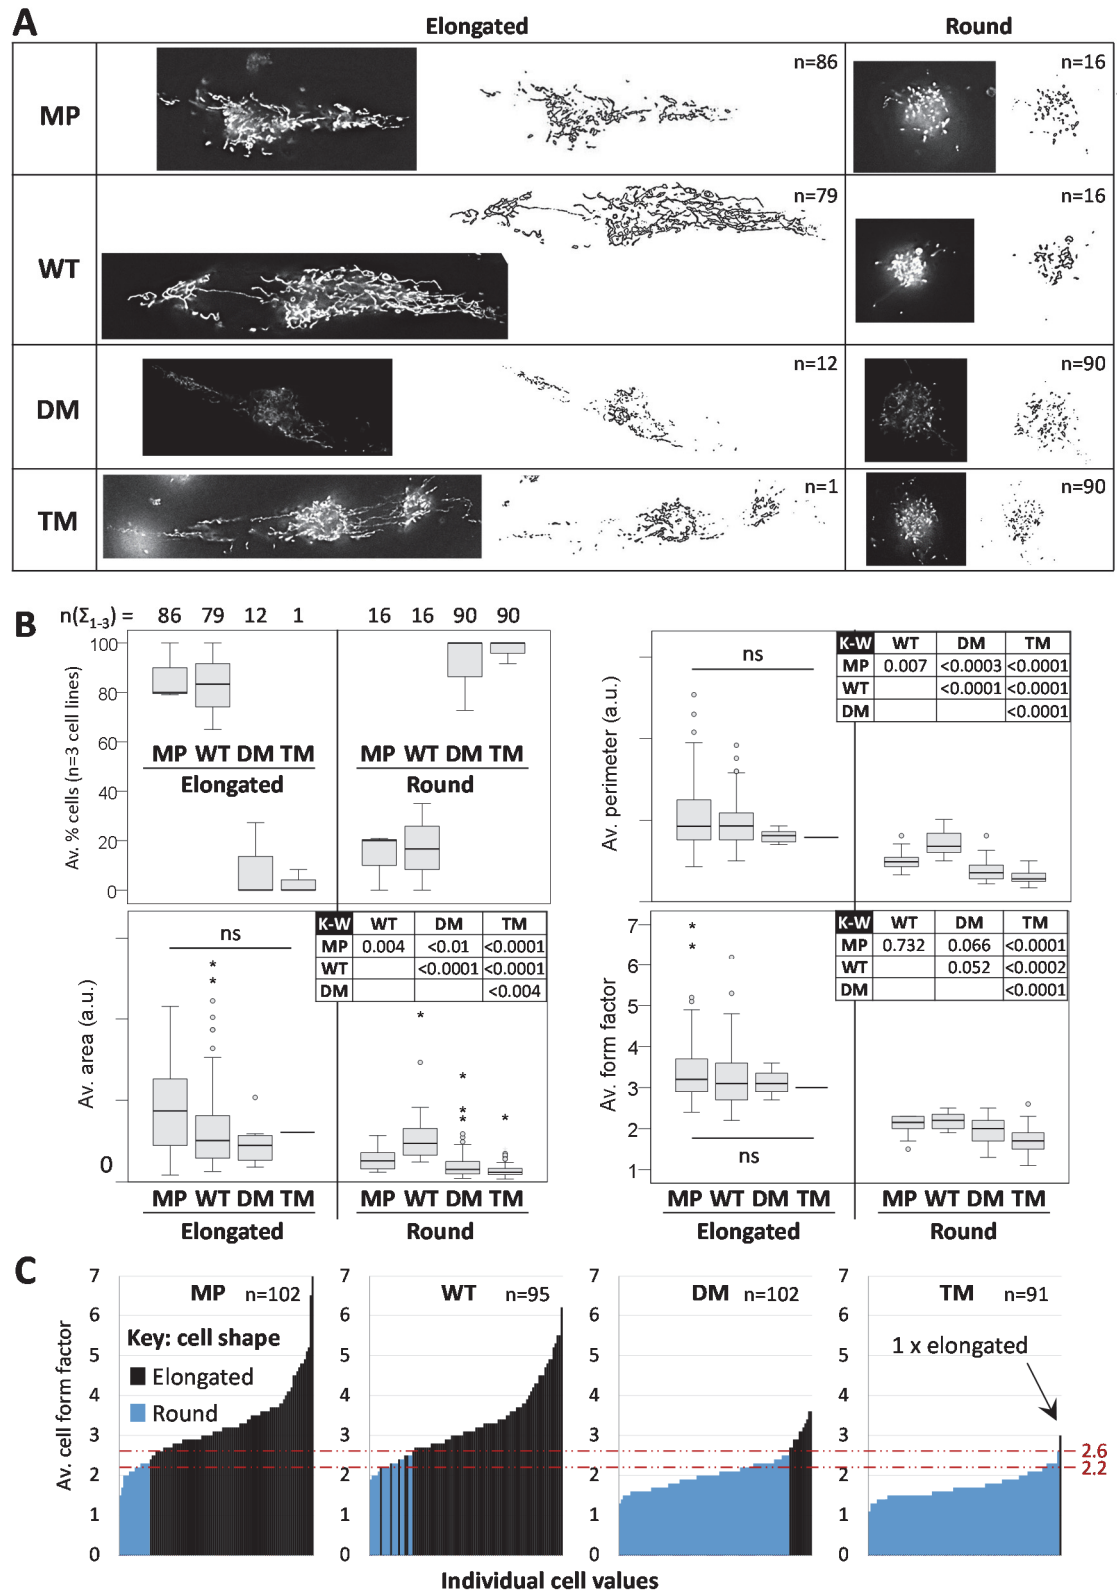

**Figure 6. PGRMC1 phosphorylation influences mitochondrial and cell morphology together.**

(A) Images show cells with close to average form factor (avFF) values for elongate or rounded cells of each cell type. The numbers of cells scored in each class are indicated. All cell images are reproduced to the same scale.

(B) Elongated and Round cells from (B) examined according to cell type. The top left panel shows average percentage elongated cells scored for three independent biological replicate cell lines per cell type across all 3 replicates ( $n(\Sigma_{1-3})$ ) corresponding to the given n values in (A). The remaining panels showing the distribution of cells in each shape and type category of Area, Perimeter and FF. Kruskal-Wallis analysis revealed no significant differences at the  $p < 0.05$  level between any elongated cell type comparisons (ns), whereas all cell types exhibited significant differences for round cells (Kruskal-Wallis,  $P < 0.001$ ). The accompanying Kruskal-Wallis *post-hoc* pairwise comparison  $p$ -values for round cells are given in the respective tables.

(C) AvFF per cell plotted including cell shape. The values where cells transition between round and elongated morphology (avFF 2.2-2.6) are indicated by dotted lines.

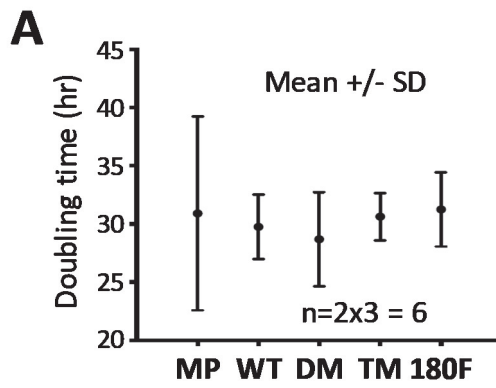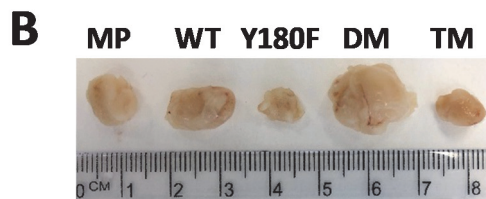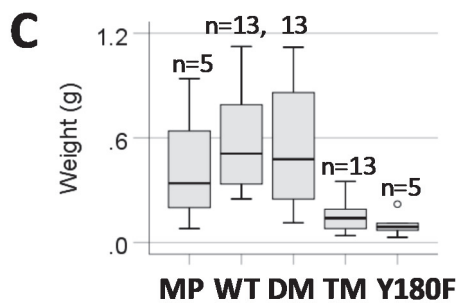

(B) ANOVA ( $F > 7.32$ ,  $p < 0.0005$ )

Post-hoc Dunnett's T3 p values:

| B  | WT    | DM    | TM      | Y180F   |
|----|-------|-------|---------|---------|
| MP | 0.992 | 0.993 | 0.564   | 0.455   |
| WT |       | >.999 | <0.0011 | <0.0005 |
| DM |       |       | <0.010  | <0.005  |
| TM |       |       |         | 0.948   |

**Figure 7. PGRMC1 Y180 contributed to growth of subcutaneous mouse xenograft tumors.**

(A) There are no differences in cell doubling time in culture. Replicates of stable cell lines 1-3 for each condition were measure to give n=6. There were no significant differences between cell conditions.

(B) Typical tumors produced by each respective class of cell.

(C) Box plot of the distribution of tumor sizes among mice injected with  $2 \times 10^6$  cells of each of the cell lines. For WT, DM and TM the results depict 4x each of lines 2 and 3, and 5 mice from line 1. MP and Y180F each represent 5 replicates of a single cell line. The box shows pairwise post-hoc Dunnett's T3 p-values after one way ANOVA.



## SUPPORTING INFORMATION FIGURES & LEGENDS

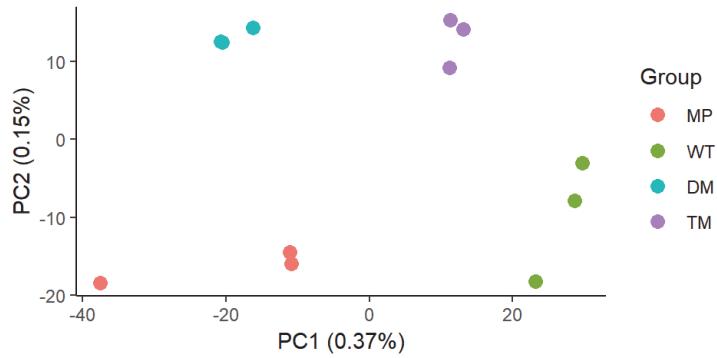

**Figure S1. Principal component analysis of SWATH-MS proteomics results.**

Related to Figure 3. Principal component (PC) analysis showing distribution of PC1 and PC2. PC1 corresponded to pathways associated with ribosomes and translation, while PC2 corresponded to pathways associated with mRNA splicing processing (see Supplemental Information File 3).

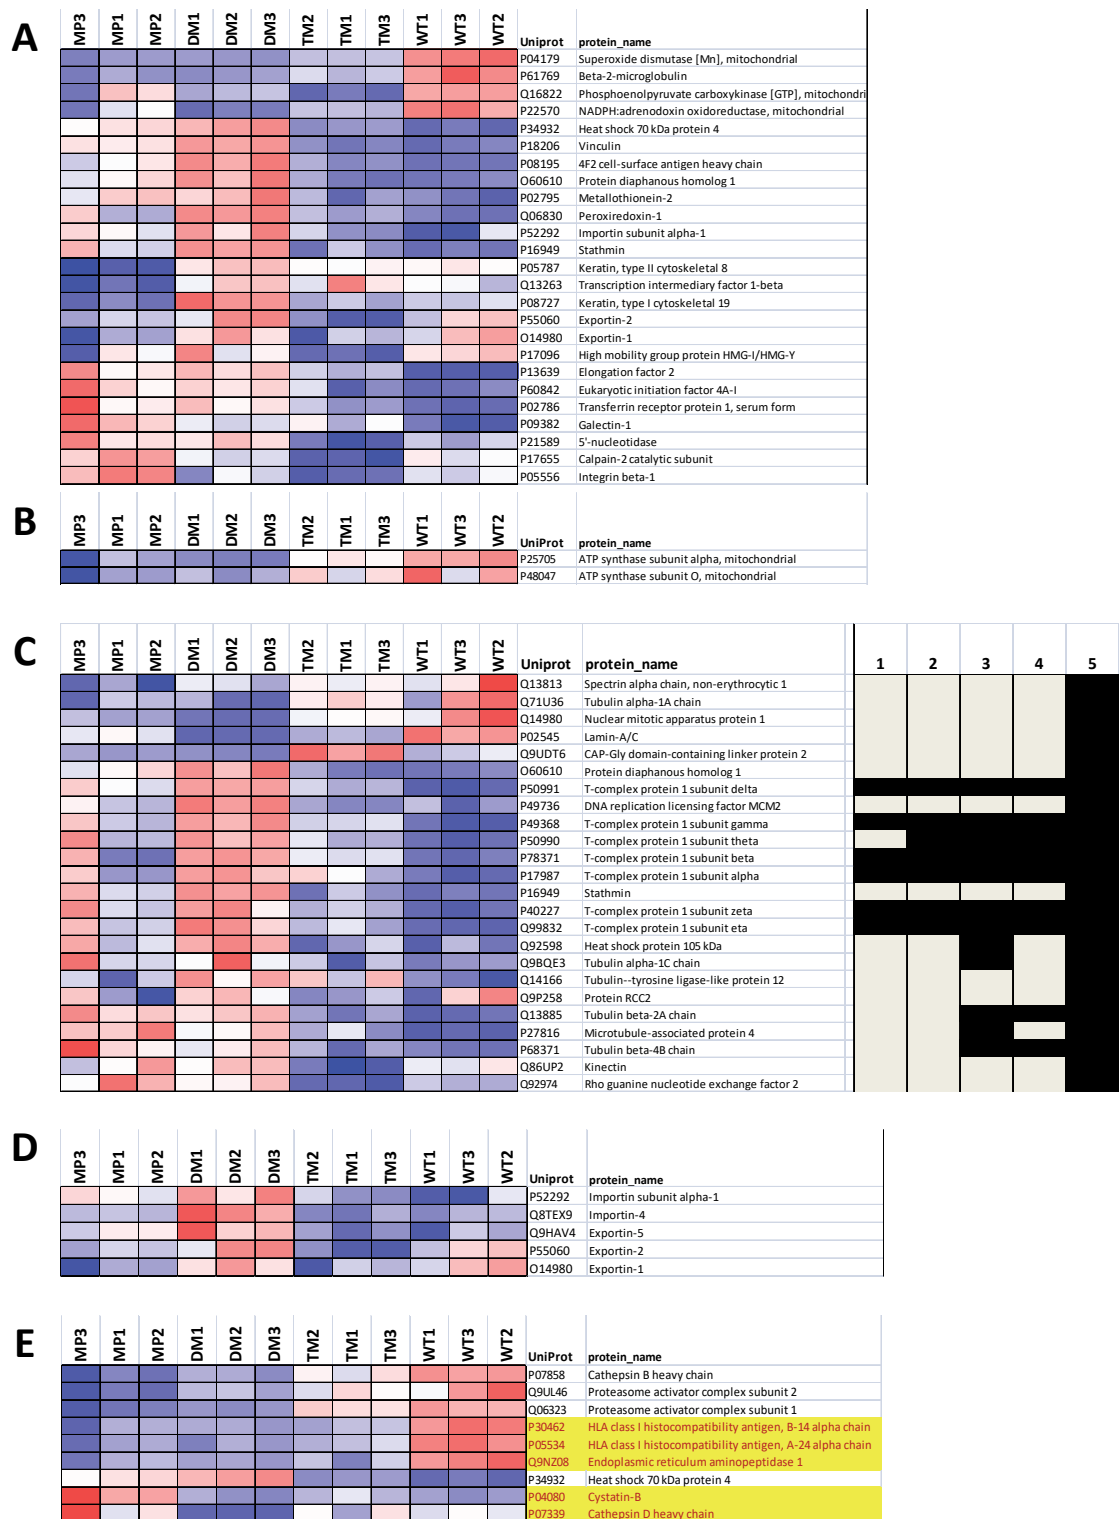

**Figure S2. Detailed views of selected pathways identified by WebGestalt analyses.** Related to Figure 3. All panels are adapted from Supplemental Information File 6. Heat map colors follow Figure 3.

(A) Proteins associated with PI3K/Akt activity (WebGestalt Database: PC, DB\_ID:1648, “Class I PI3K signaling events mediated by Akt”) are less abundant in TM cells.

(B) F1/F0 ATPase subunits elevated in WT and TM cells.

(C) Abundances of proteins associated with protein folding and microtubule function are altered by PGRMC1 phosphorylation status. Proteins detected in any of the following WebGestalt pathways or functions (1-4) or a manual search (5) are mapped against their expression profiles. 1) cellular component chaperonin-containing T-complex GO:0005832. 2) PC pathway Chaperonin-mediated protein folding DB\_ID:710. 3) cellular component microtubule GO:0005874. 4) PC pathway Protein folding DB\_ID:712. 5) Description from the list of 243 proteins (Supplemental Information File 6) contains keywords "tubulin" or "microtubule" (manual search) (Adapted from Supplemental Information File 6). 2-tailed t-test *p*-values for all sample comparisons are available in Supplemental Information File 4.

(D) Proteins associated with nuclear import/export that are elevated in DM cells.

(E) Antigen processing and presentation enzymes are affected by PGRMC1 phosphorylation status. Manual additions to KEGG pathway ID:04612 “Antigen processing and presentation” (no yellow shading: from Supplemental Information File 6 and Supplemental Information File 5) are indicated with yellow highlighting.

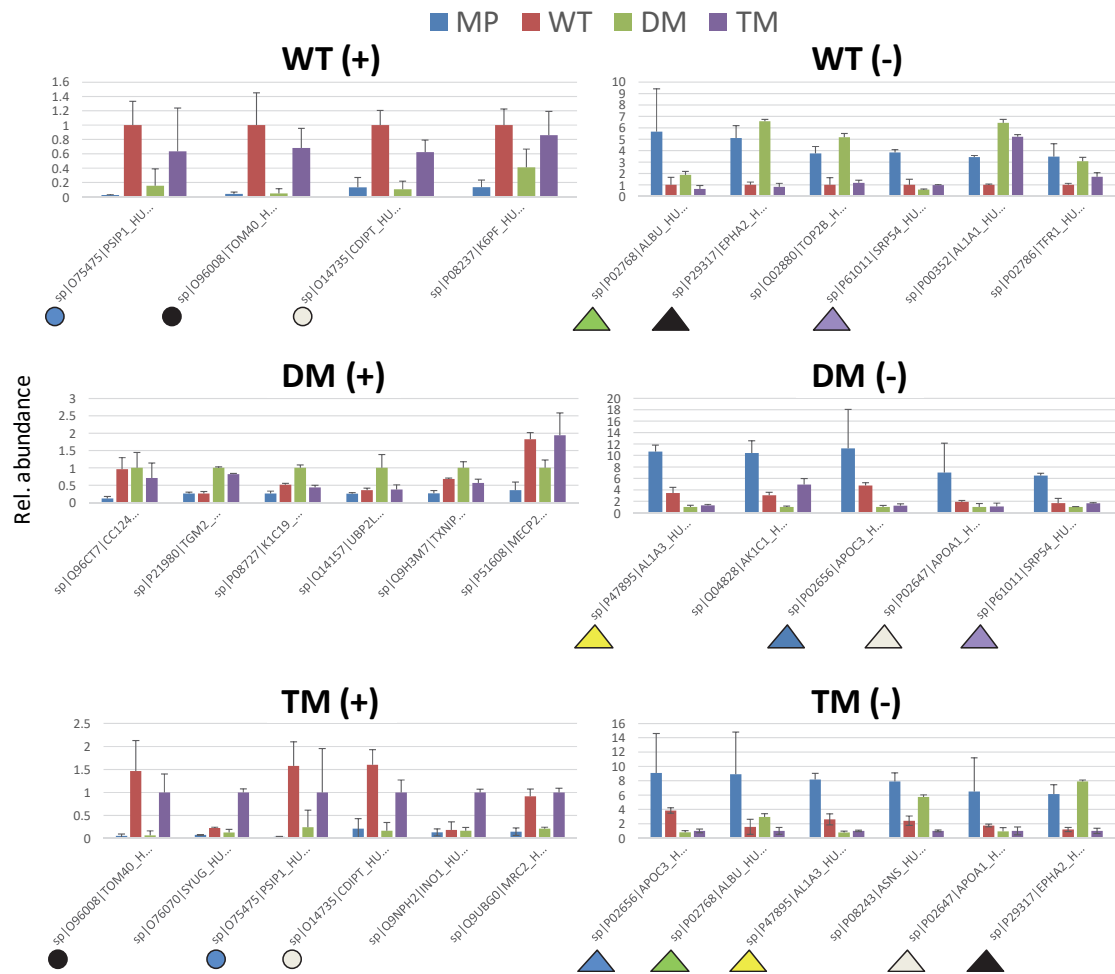

**Figure S3. Highest and lowest differentially abundant proteins.** Panels show the six most (+) and least (-) abundant proteins for each cell type that were significantly differentially abundant between cell types. Related to Figure 3. Identical colored symbols depict the same protein in different cell types, where circles represent high abundance and triangles represent low abundance. E.g. Mitochondrial import receptor subunit TOM40 (O96008), CDP-diacylglycerol-inositol 3-phosphatidyltransferase (CDIPT, O14735) (phosphatidylinositol synthesis) and transcriptional coactivator PSIP1 (O75475) are more abundant in WT and TM. Aldehyde dehydrogenase 1A3 (P47895), APOC3 (P02656) and APOA1 (P02647) are less abundant in DM and TM, whereas the receptor tyrosine kinase ephrin type-A receptor 2 (EPHA2, P29317) is among the lowest abundance differential proteins in WT and TM. Protein abundances (measured ion intensities) for all proteins are available in Supplemental Information File 2.

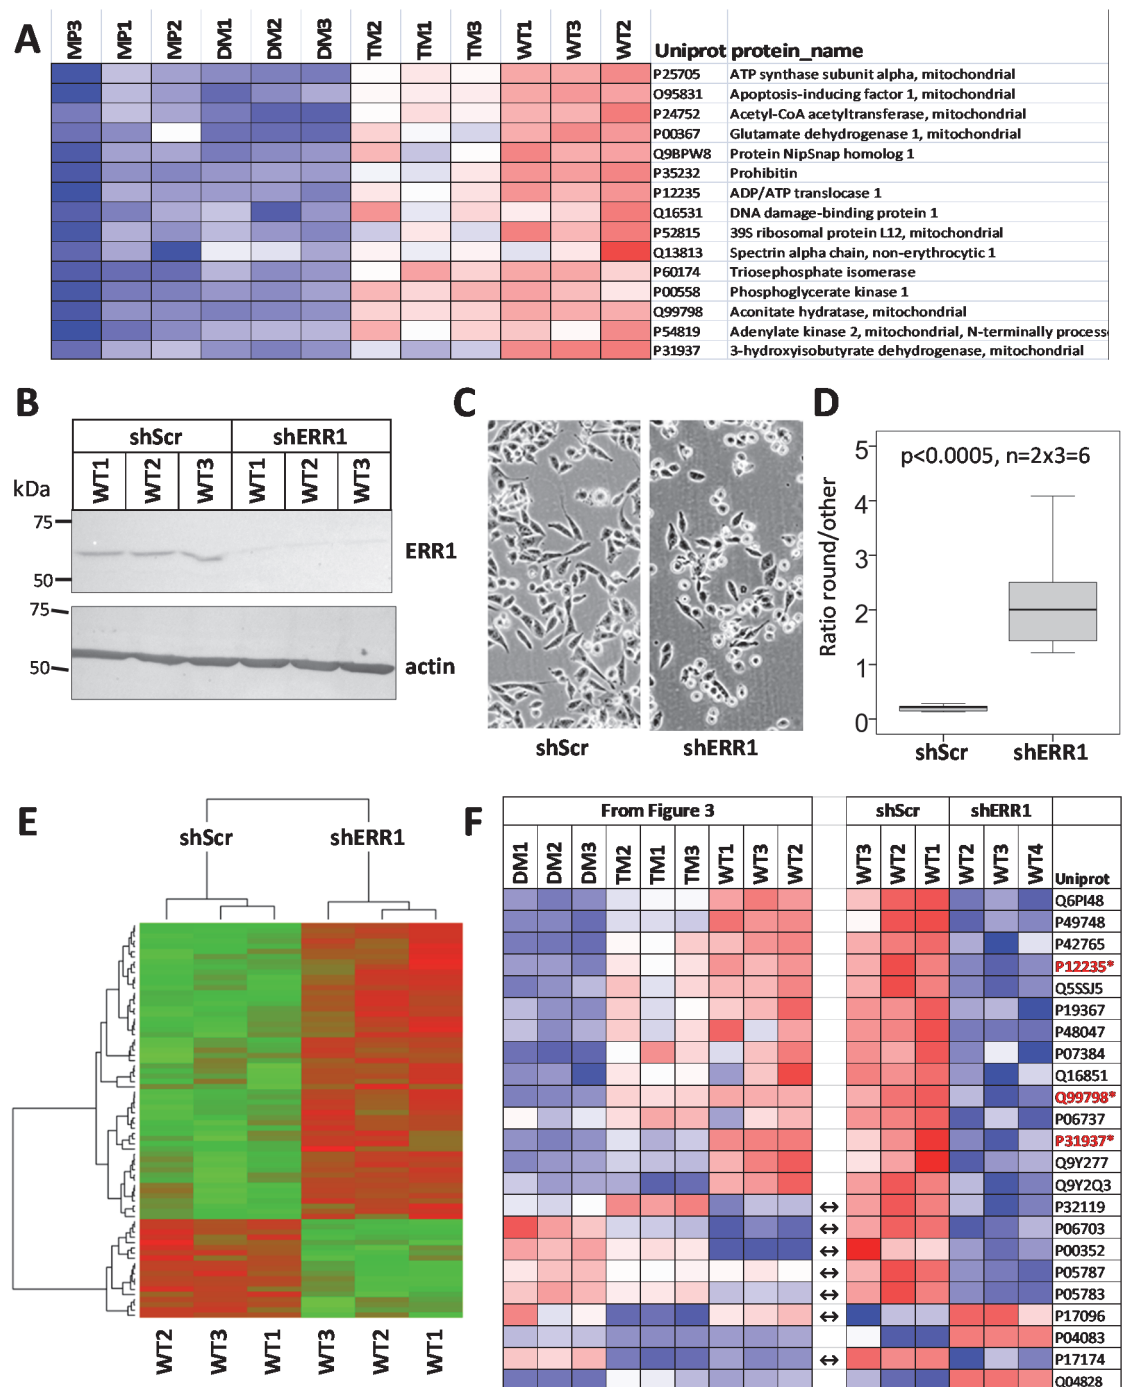

**Figure S4. Proteins associated with predicted Estrogen Receptor Related 1 (ERR1) transcription factor activity are more abundant in WT and TM cells.** Related to Figure 3 and Supplemental Information File 6. Data are available via ProteomeXchange with identifier PXD014789.

(A) Proteins quantified by SWATH-MS and predicted by WebGestalt Transcription Factor target enrichment analysis (WebGestalt Database: Transcription Target, Name: hsa\_TGACCTY\_V\$ERR1\_Q2, ID:DB\_ID:2414) to be dependent upon ERR1 transcription (Adapted from Supplemental Information File 6). Heat map colors follow Figure 3.

(B) Western blot of shRNA attenuation of ERR1 (top panel) in WT cells, compared to scramble shRNA control. Lower panel: beta actin loading control.

(C) ERR1 attenuation by shRNA induces morphological changes to WT cells.

(D) Ratio of rounded to other cells as scored for replicate images from each of the cell lines from B.  $p < 0.0005$ , 1 tailed t-test.

(E) SWATH MS quantification of proteins significantly differentially abundant between cells expressing scramble shRNA or anti-ERR1 shRNA (according to the selection criteria of Supplemental Information File 4). 57 proteins became more abundant after shRNA depletion of ERR1, and 19 proteins became less abundant. In this panel green depicts lower abundance and red depicts higher abundance. Brown depicts similar abundance.

(F) Proteins present in (E) which are also present in the 243 protein list of Supplemental Information File 6. Heat map colors follow Figure 3. The left panel shows expression in the original result of Supplemental Information File 6. The right panel shows expression in the presence of scramble shRNA or anti-ESSR1 shRNA. All proteins from Figure S4A except Q9BPW8 were detected in the shRNA experiment. Double headed arrows indicate proteins which differ in expression tendency between WT (left) and WT-scramble shRNA cells (right). This may be caused by the puromycin selection of both sh-scr and shERR1 cells but not the parental WT cells, however this requires further investigation. Proteins with Uniprot ID highlighted by asterisk (bold red) are those both originally predicted by WebGestalt to be associated with ERR1 transcription factor (A), and which exhibited significantly altered abundance after shRNA attenuation of ERR1 protein.

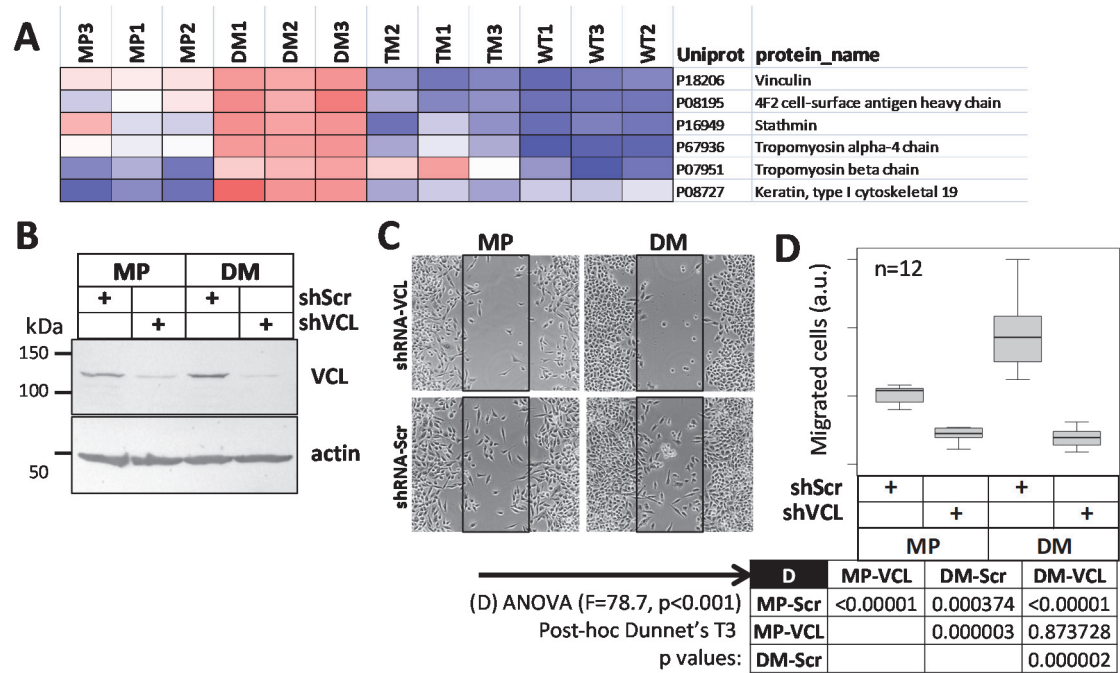

**Figure S5. The DM migratory phenotype is dependent upon vinculin.** Related to Figure 3.

(A) Proteins associated with actin-myosin contraction (WebGestalt Database: PC, DB\_ID:144, "Smooth Muscle Contraction") are more abundant in DM cells. Heat map colors follow Figure 3.

(B) Western blot of Vinculin (VCL) and actin levels in cells expressing scramble control (shScr) or anti Vinculin (shVCL) shRNA.

(C) Scratch assays as indicated were performed following the methods of Figure 1E-F.

(D) Boxplot showing results of 12 replicates of (C). ANOVA gave F=78.7, p < 0.00001. The table shows post-hoc Dunnet's T3 p-values.

## Supporting Information files

**Supplemental Information File 1.** A zip archive containing time lapse mp4 movies of migrating cells in scratch assays. Related to Figure 1. Images were taken at 10 minute intervals over 36 hours and are replayed over 65 seconds at 9 frames per second (2000x real time). The presented 32.4 MB MP4 files were generated from the original 666MB (6000x real time) .avi files (length 21 sec, frame width x height 1024x1024, Data rate/bit rate 287462 kbps, frame rate 100 fps) by processing in Adobe Premiere Pro 2017 using the following settings: Preset “custom”; Width: 1024; Height 1024; Aspect Square Pixels (1.0); Field Order: progressive; Profile: high; Target Bitrate [Mbps] 4.08; Maximum Bitrate [Mbps] 4.39; 9 fps; No Audio; Output as standard .mp4; Time Interpolation: Frame Sampling; Stream Compatibility: Standard; Variable bit rate, single pass; Number of frames 00:01:04:09. The zip archive contains 4 files with filenames representing cell type and date of measurement (yyyymmdd).

(A) A\_MP\_20170807.mp4

(B) B\_WT\_20170809.mp4

(C) C\_DM\_20170815.mp4

(D) D\_TM\_20170817.mp4

**Supplemental Information File 2.** An Excel file showing experimental design, normalized ion intensities for 1330 proteins identified by SWATH-MS proteomics, and six pairwise comparisons between the 4 sample types [1) MP v. WT, 2) MP v. DM, 3) MP v. TM, 4) WT v. DM, 5) WT v. TM, and 6) DM v. TM]. Related to Figure 3. The first tab contains a detailed descriptive legend. Data are available via ProteomeXchange with identifier PXD014716.

**Supplemental Information File 3.** Principal component analysis results for pathways associated with SWATH-MS proteomics results.

**Supplemental Information File 4.** An excel file containing proteomics results for 243 proteins which fulfil stringency criteria of t-test *p*-value of less than 0.05, and a fold change greater than 1.5 by both the protein and peptide approaches from Supplemental Information File 2. Related to Figure 3. Column B shows “red” (more abundant in comparative sample 1) and “blue” (less abundant in sample 1) significantly differential proteins for each pair wise comparison which were later used for “red” and ‘blue’ WebGestalt pathways enrichment analysis (Supplemental Information File 5). Comparisons follow Supplemental Information File 2.



**Supplemental Information File 5.** WebGestalt pathway mapping excel results file for red and blue proteins from Supplemental Information File 4. Related to Figure 3.

(A) WebGestalt Features (GO, KEGG Pathways, Wikipathways, Pathway Commons, Transcription Factors) significant at the  $\text{adjP} \leq 0.001$  level between any 2 comparisons.

(B) Features from A, viewed at the  $\text{adjP} < 0.05$  level for each red and blue comparison, and showing adjusted  $p$ -values ( $\text{adjP}$ ) for each comparison where  $\text{adjP} < 0.05$  (or  $\text{adjP} < 0.1$  for two comparisons as indicated by paler coloring). Blue means that proteins associated with a given the feature were less abundant in that cell line, with red indicating higher abundance. Because separate WebGestalt analyses were performed for red and blue lists of proteins from Supplemental Information File 4, some features were significant for both red and blue. In that case the color and  $\text{adjP}$  for the most significant analysis is given, with the other cell being colored black.

**Supplemental Information File 6.** An excel file with heat map protein IDs and pathways for red vs. blue pathways  $\text{adjP} < 0.001$ . Related to Figure 3. This file is derived from the results of Supplemental Information File 5, and is the source file for Figure 3. Proteins suggested by clustering by inferred models of evolution (CLIME) analysis to co-evolve with PGRMC1 with log likelihood ratio greater than 12 [14] are present in the list, marked yellow for mitochondrial localization (WebGestalt GO:0005739) or green for cytoplasmic (P00387).

**Supplemental Information File 7.** Original WebGestalt results files for the analysis of Figure 3 and Supplemental Information File 5. Related to Figure 3. WebGestalt results files for red and blue comparison pathways  $\text{adjP} < 0.001$ .

**Supplemental Information File 8.** Original WebGestalt results files for red and blue comparison pathways where  $\text{adjP} < 0.1$ . Related to Figure 3.

**Supplemental Information File 9.** A zip archive containing time lapse Holographic video .avi files of cells. These images are based upon differences in refractive index [85], and are provided for the dynamic visualization of mitochondria. Prominent visible features include small white lipid droplets and cholesterol-rich mitochondria [14], as well as nuclear membrane and nucleoli. The previously described MIA PaCa-2 cell bleb-like protrusions [63] are apparent as highly dynamic rearrangements of the cytoplasmic membrane, which may contribute to intercellular communication.

(A) MP cells

(B) WT cells

(C) DM cells

(D) TM cells
